# Supplementary material for: Increased Cellular Distribution of Vimentin and Ret in the Cingulum of Rat Offspring After Developmental Exposure to Decabromodiphenyl Ether or 1,2,5,6,9,10-Hexabromocyclododecane
Source: PubMed Central journal article supplement — J Toxicol Pathol. 2013 Jul 10;26(2):119–29. doi: 10.1293/tox.26.119 (PMC3695334; doi:10.1293/tox.26.119), 2013-07-10
Supplement: tox-26-119-s001.pdf [file tox-26-119-s001.pdf]

**Supplementary Table 1.**

List of genes commonly up-regulated in the microdissected cerebral white matter region after exposure to DBDE at 10, 100, and 1000 ppm ( $\geq 2$ -fold)

| Accession no.            | Gene title                                                                                    | Symbol     | DBDE   |         |          |
|--------------------------|-----------------------------------------------------------------------------------------------|------------|--------|---------|----------|
|                          |                                                                                               |            | 10 ppm | 100 ppm | 1000 ppm |
| Up-regulated (129 genes) |                                                                                               |            |        |         |          |
| XM_002725261             | Similar to KB07 protein                                                                       | RGD1561940 | 5.42   | 15.74   | 14.96    |
| AI176450                 | EST                                                                                           | –          | 3.60   | 11.22   | 12.26    |
| AI237569                 | EST                                                                                           | –          | 6.60   | 7.79    | 12.06    |
| NM_012718                | androgen regulated 20 kDa protein                                                             | Andpro     | 4.36   | 5.97    | 11.48    |
| NM_145879                | suppressor of cytokine signaling 1                                                            | Socs1      | 3.19   | 4.90    | 11.25    |
| NM_001108693             | retinol binding protein 7, cellular                                                           | Rbp7       | 3.41   | 13.75   | 10.17    |
| AI712659                 | EST                                                                                           | –          | 2.48   | 3.66    | 9.02     |
| NM_001108617             | PFTAIRE protein kinase 1                                                                      | Pftk1      | 2.57   | 2.32    | 6.57     |
| NM_031502                | amylase 2                                                                                     | Amy2       | 6.73   | 3.92    | 6.36     |
| XM_002725036             | Leucine rich repeat containing 3B                                                             | Lrrc3b     | 2.67   | 2.61    | 6.36     |
| BM385169                 | EST                                                                                           | –          | 4.47   | 2.33    | 6.25     |
| AI502924                 | EST                                                                                           | –          | 2.22   | 5.65    | 6.20     |
| NM_173309                | ELAV (embryonic lethal, abnormal vision, Drosophila)-like 2                                   | Elavl2     | 3.97   | 2.11    | 6.02     |
| NM_001101680             | forkhead box C2                                                                               | Foxc2      | 3.11   | 2.55    | 5.83     |
| AW523012                 | EST                                                                                           | –          | 2.05   | 2.14    | 5.75     |
| NM_001025051             | family with sequence similarity 110, member C                                                 | Fam110c    | 6.00   | 8.02    | 5.64     |
| BF394267                 | EST                                                                                           | –          | 2.44   | 6.25    | 5.55     |
| BI295646                 | EST                                                                                           | –          | 2.06   | 4.09    | 5.52     |
| AA893529                 | EST                                                                                           | –          | 2.59   | 3.54    | 5.41     |
| NM_001025740             | ribonucleotide reductase M2                                                                   | Rrm2       | 2.20   | 2.10    | 5.39     |
| AF053092                 | EST                                                                                           | –          | 2.80   | 5.63    | 5.34     |
| NM_001106908             | similar to RIKEN cDNA 4832428D23 gene                                                         | RGD1561425 | 2.19   | 4.04    | 5.21     |
| NM_138879                | selectin E                                                                                    | Sele       | 4.85   | 3.72    | 5.13     |
| NM_030985                | angiotensin II receptor, type 1a                                                              | Agtr1a     | 2.57   | 9.55    | 5.10     |
| NM_181440                | glutamine/glutamic acid-rich protein A                                                        | Grpca      | 3.05   | 4.04    | 5.02     |
| BF288392                 | EST                                                                                           | –          | 2.29   | 7.03    | 4.99     |
| NM_001107058             | mitogen activated protein kinase kinase kinase 3                                              | Map3k3     | 2.86   | 2.36    | 4.96     |
| NM_001109226             | Proline-rich transmembrane protein 4                                                          | Prrt4      | 3.01   | 5.52    | 4.94     |
| NM_001013079             | oxysterol binding protein-like 2                                                              | Osbp12     | 2.78   | 6.87    | 4.88     |
| NM_001136151             | neuregulin 2                                                                                  | Nrg2       | 2.61   | 3.91    | 4.84     |
| AI072042                 | EST                                                                                           | –          | 3.55   | 2.73    | 4.81     |
| AI385307                 | EST                                                                                           | –          | 2.46   | 2.06    | 4.72     |
| AI535212                 | EST                                                                                           | –          | 2.15   | 5.15    | 4.69     |
| AI113065                 | EST                                                                                           | –          | 2.84   | 7.40    | 4.63     |
| AW528250                 | EST                                                                                           | –          | 2.32   | 2.49    | 4.59     |
| NM_001173426             | RNA binding protein with multiple splicing 2                                                  | Rbpms2     | 3.24   | 5.76    | 4.53     |
| NM_053986                | myosin Ib                                                                                     | Myo1b      | 2.10   | 3.56    | 4.53     |
| BE104268                 | EST                                                                                           | –          | 2.07   | 2.86    | 4.52     |
| NM_001037357             | leukocyte immunoglobulin-like receptor, subfamily B (with TM and ITIM domains), member 3-like | Lilrb3l    | 2.72   | 2.69    | 4.41     |
| AI639063                 | EST                                                                                           | –          | 4.04   | 4.29    | 4.37     |
| NM_001108394             | zinc finger, CCHC domain containing 24                                                        | Zcchc24    | 3.01   | 3.96    | 4.36     |
| NM_012620                | serine (or cysteine) peptidase inhibitor, clade E, Serpine1 member 1                          |            | 2.75   | 4.72    | 4.34     |
| AI102874                 | EST                                                                                           | –          | 2.18   | 6.65    | 4.30     |
| BF396605                 | EST                                                                                           | –          | 2.23   | 3.66    | 4.25     |
| NM_012596                | leptin receptor                                                                               | Lepr       | 2.26   | 3.54    | 4.23     |

|              |                                                                               |         |      |      |      |
|--------------|-------------------------------------------------------------------------------|---------|------|------|------|
| NM_001135877 | TAF7-like RNA polymerase II, TATA box binding protein (TBP)-associated factor | Taf7l   | 2.59 | 4.56 | 4.20 |
| NM_198735    | ADP-ribosyltransferase 2b                                                     | Art2b   | 2.20 | 2.06 | 4.20 |
| NM_001109304 | cripto, FRL-1, cryptic family 1                                               | Cfc1    | 3.24 | 3.19 | 4.10 |
| BF396608     | EST                                                                           | –       | 2.00 | 3.32 | 4.07 |
| NM_001009691 | Doublecortin-like kinase 2                                                    | Dclk2   | 2.42 | 4.02 | 4.05 |
| NM_019236    | hairy and enhancer of split 2                                                 | Hes2    | 3.63 | 2.35 | 4.03 |
| NM_017001    | erythropoietin                                                                | Epo     | 3.58 | 3.25 | 4.02 |
| NM_001025013 | melanoma antigen family B, 16                                                 | Mageb16 | 2.40 | 2.46 | 4.01 |
| NM_017144    | troponin I type 3                                                             | Tnni3   | 4.51 | 3.15 | 4.01 |
| AI059493     | EST                                                                           | –       | 2.27 | 2.18 | 4.00 |
| AI706203     | EST                                                                           | –       | 2.66 | 3.73 | 3.98 |
| BF288661     | EST                                                                           | –       | 4.32 | 3.76 | 3.97 |
| NM_001107025 | abhydrolase domain containing 15                                              | Abhd15  | 2.49 | 8.15 | 3.91 |
| AA955915     | EST                                                                           | –       | 2.71 | 2.71 | 3.87 |
| BE096287     | EST                                                                           | –       | 2.44 | 2.01 | 3.87 |
| AI030285     | EST                                                                           | –       | 2.65 | 2.23 | 3.87 |
| NM_001107097 | zinc finger and BTB domain containing 11                                      | Zbtb11  | 2.59 | 2.89 | 3.85 |
| NM_001107413 | iroquois homeobox 3                                                           | Irx3    | 2.42 | 4.11 | 3.79 |
| AW527665     | EST                                                                           | –       | 2.70 | 2.31 | 3.78 |
| BF391952     | EST                                                                           | –       | 2.14 | 5.61 | 3.70 |
| BF392832     | EST                                                                           | –       | 6.00 | 2.82 | 3.63 |
| AA859474     | EST                                                                           | –       | 4.11 | 6.71 | 3.61 |
| NM_173110    | prolactin family 8, subfamily a, member 5                                     | Prl8a5  | 5.16 | 3.64 | 3.60 |
| XM_001055799 | EST                                                                           | –       | 2.03 | 4.01 | 3.57 |
| NM_183331    | coagulation factor VIII, procoagulant component                               | F8      | 2.87 | 2.71 | 3.53 |
| XM_001069604 | smoothelin-like 1                                                             | Smtnl1  | 2.30 | 2.40 | 3.52 |
| NM_024353    | phospholipase C, beta 4                                                       | Plcb4   | 2.54 | 2.14 | 3.50 |
| NM_134384    | spermatogenesis associated 19                                                 | Spata19 | 2.67 | 2.59 | 3.50 |
| NM_001024786 | WD repeat domain 78                                                           | Wdr78   | 2.19 | 4.40 | 3.49 |
| BF415997     | EST                                                                           | –       | 2.26 | 3.46 | 3.44 |
| NM_001108251 | Ubiquilin 2                                                                   | Ubqln2  | 2.77 | 7.77 | 3.35 |
| BF416277     | EST                                                                           | –       | 2.00 | 3.93 | 3.30 |
| NM_053704    | BCL2-interacting killer                                                       | Bik     | 2.84 | 3.94 | 3.23 |
| NM_012841    | deleted in colorectal carcinoma                                               | Dcc     | 3.30 | 2.75 | 3.17 |
| NM_021837    | myc-like oncogene, s-myc protein                                              | Mycs    | 3.39 | 2.96 | 3.10 |
| XM_001056035 | forkhead box I2                                                               | Foxi2   | 3.99 | 3.48 | 3.08 |
| AI113090     | EST                                                                           | –       | 3.87 | 2.45 | 3.05 |
| NM_138978    | prokineticin receptor 2                                                       | Prokr2  | 2.76 | 2.06 | 3.04 |
| AW534043     | EST                                                                           | –       | 2.24 | 3.45 | 2.97 |
| NM_001106490 | myosin binding protein C                                                      | Mybpc3  | 2.05 | 3.28 | 2.96 |
| XM_002726010 | EST                                                                           | –       | 2.39 | 2.05 | 2.96 |
| NM_053708    | gastrulation brain homeobox 2                                                 | Gbx2    | 2.43 | 2.59 | 2.93 |
| BF403955     | EST                                                                           | –       | 2.93 | 3.11 | 2.92 |
| NM_012770    | guanylate cyclase 1, soluble, beta 2                                          | Gucy1b2 | 2.15 | 6.00 | 2.90 |
| NM_152936    | serine peptidase inhibitor, Kazal type 1                                      | Spink1  | 2.53 | 3.56 | 2.89 |
| NM_019374    | prodynorphin                                                                  | Pdyn    | 2.80 | 3.59 | 2.88 |
| NM_012684    | variable coding sequence A1                                                   | Vcsa1   | 4.80 | 8.64 | 2.79 |
| NM_001129878 | Homeo box A10                                                                 | Hoxa10  | 2.32 | 2.58 | 2.79 |
| BI290864     | EST                                                                           | –       | 2.04 | 3.41 | 2.78 |
| NM_001109257 | kelch domain containing 5                                                     | Klhdc5  | 2.13 | 2.70 | 2.77 |
| NM_173322    | proline-rich nuclear receptor coactivator 1                                   | Pnrc1   | 2.77 | 5.68 | 2.75 |
| AI011647     | EST                                                                           | –       | 2.42 | 4.75 | 2.74 |

|              |                                                                           |         |      |      |      |
|--------------|---------------------------------------------------------------------------|---------|------|------|------|
| NM_001106024 | phosphodiesterase 6B, cGMP-specific, rod, betaPde6b                       |         | 2.90 | 3.69 | 2.71 |
| XM_001069645 | EST                                                                       | –       | 5.01 | 4.69 | 2.71 |
| BF401369     | EST                                                                       | –       | 2.23 | 2.76 | 2.66 |
| NM_001110490 | LIM domain binding 3                                                      | Ldb3    | 2.24 | 2.77 | 2.63 |
| NM_001177682 | purinergic receptor P2Y, G-protein coupled, 10                            | P2ry10  | 2.58 | 4.27 | 2.61 |
| AI502559     | EST                                                                       | –       | 2.33 | 2.06 | 2.60 |
| NM_053818    | solute carrier family 6 (neurotransmitter transporter, glycine), member 9 | Slc6a9  | 2.21 | 3.11 | 2.60 |
| BF410362     | EST                                                                       | –       | 2.82 | 3.72 | 2.54 |
| XM_002729411 | EST                                                                       | –       | 2.33 | 3.38 | 2.48 |
| NM_138836    | protease, serine, 8                                                       | Prss8   | 2.12 | 2.12 | 2.48 |
| NM_001107804 | Molybdenum cofactor synthesis 3                                           | Mocs3   | 4.36 | 2.98 | 2.48 |
| BE120031     | EST                                                                       | –       | 2.22 | 2.80 | 2.43 |
| NM_139113    | nuclear receptor subfamily 2, group F, member 6                           | Nr2f6   | 3.32 | 2.84 | 2.43 |
| BF399574     | EST                                                                       | –       | 2.49 | 6.21 | 2.42 |
| NM_001134598 | EST                                                                       | –       | 2.40 | 2.22 | 2.41 |
| AW920335     | EST                                                                       | –       | 2.19 | 2.17 | 2.41 |
| NM_001127683 | heat shock transcription factor 2 binding protein                         | Hsf2bp  | 2.67 | 3.11 | 2.41 |
| AW921534     | EST                                                                       | –       | 2.13 | 2.27 | 2.40 |
| XM_001066131 | EST                                                                       | –       | 2.84 | 2.88 | 2.36 |
| NM_017023    | potassium inwardly-rectifying channel, subfamily J, member 1              | Kcnj1   | 3.35 | 2.27 | 2.27 |
| NM_022379    | transcription factor EC                                                   | Tfec    | 2.27 | 2.67 | 2.27 |
| XR_085738    | family with sequence similarity 184, member A                             | Fam184a | 2.23 | 2.23 | 2.23 |
| BF414624     | EST                                                                       | –       | 2.54 | 2.00 | 2.23 |
| NM_053629    | follistatin-like 3                                                        | Fstl3   | 2.56 | 2.51 | 2.19 |
| BF400760     | EST                                                                       | –       | 2.08 | 6.58 | 2.15 |
| NM_001108497 | EST                                                                       | –       | 2.35 | 2.27 | 2.15 |
| BF400813     | EST                                                                       | –       | 2.21 | 2.57 | 2.05 |
| BF400843     | EST                                                                       | –       | 2.38 | 4.12 | 2.04 |
| AI237240     | EST                                                                       | –       | 2.22 | 2.42 | 2.03 |
| NM_001033955 | calcitonin-related polypeptide alpha                                      | Calca   | 2.10 | 2.78 | 2.03 |
| BF403851     | EST                                                                       | –       | 2.26 | 2.85 | 2.03 |
| BF396335     | EST                                                                       | –       | 2.50 | 2.61 | 2.01 |

Abbreviations: DBDE, decabromodiphenyl ether; EST, expressed sequence tag.
