# Supplementary material for: Increased Cellular Distribution of Vimentin and Ret in the Cingulum of Rat Offspring After Developmental Exposure to Decabromodiphenyl Ether or 1,2,5,6,9,10-Hexabromocyclododecane
Source: PubMed Central journal article supplement — J Toxicol Pathol. 2013 Jul 10;26(2):119–29. doi: 10.1293/tox.26.119 (PMC3695334; doi:10.1293/tox.26.119), 2013-07-10
Supplement: tox-26-119-s002.pdf [file tox-26-119-s002.pdf]

**Supplementary Table 2.**

List of genes commonly downregulated in the microdissected cerebral white matter region after exposure to DBDE at 10, 100, and 1000 ppm ( $\leq 0.5$ -fold)

| Accession no.            | Gene title                       | Symbol  | DBDE   |         |          |  |
|--------------------------|----------------------------------|---------|--------|---------|----------|--|
|                          |                                  |         | 10 ppm | 100 ppm | 1000 ppm |  |
| Downregulated (16 genes) |                                  |         |        |         |          |  |
| NM_001025420             | lymphocyte-specific protein 1    | Lsp1    | 0.18   | 0.11    | 0.16     |  |
| NM_172222                | complement component 2           | C2      | 0.46   | 0.27    | 0.17     |  |
| AW142962                 | EST                              | –       | 0.19   | 0.45    | 0.22     |  |
| BF403278                 | EST                              | –       | 0.45   | 0.33    | 0.23     |  |
| BI291223                 | EST                              | –       | 0.46   | 0.35    | 0.24     |  |
| NM_145672                | chemokine (C-X-C motif) ligand 9 | Cxcl9   | 0.48   | 0.31    | 0.27     |  |
| AA892204                 | EST                              | –       | 0.29   | 0.34    | 0.28     |  |
| BI290841                 | EST                              | –       | 0.47   | 0.35    | 0.30     |  |
| BF416112                 | EST                              | –       | 0.39   | 0.37    | 0.31     |  |
| NM_130424                | transmembrane protease, serine 2 | Tmprss2 | 0.43   | 0.23    | 0.32     |  |
| AI058852                 | EST                              | –       | 0.36   | 0.30    | 0.35     |  |
| NM_147135                | SH3-binding domain kinase 1      | Sbk1    | 0.22   | 0.30    | 0.36     |  |
| NM_001007684             | Kruppel-like factor 2            | Klf2    | 0.41   | 0.36    | 0.38     |  |
| NM_022707                | phospholamban                    | Pln     | 0.25   | 0.24    | 0.38     |  |
| BE100194                 | EST                              | –       | 0.44   | 0.37    | 0.40     |  |
| BF567236                 | EST                              | –       | 0.45   | 0.43    | 0.45     |  |

DBDE, decabromodiphenyl ether; EST, expressed sequence tag.
