# Supplementary material for: Increased Cellular Distribution of Vimentin and Ret in the Cingulum of Rat Offspring After Developmental Exposure to Decabromodiphenyl Ether or 1,2,5,6,9,10-Hexabromocyclododecane
Source: PubMed Central journal article supplement — J Toxicol Pathol. 2013 Jul 10;26(2):119–29. doi: 10.1293/tox.26.119 (PMC3695334; doi:10.1293/tox.26.119), 2013-07-10
Supplement: tox-26-119-s003.pdf [file tox-26-119-s003.pdf]

**Supplementary Table 3.**List of genes commonly up-regulated in the microdissected cerebral white matter region after exposure to DBDE at 100 and 1000 ppm ( $\geq 2$ -fold)

| Accession no.            | Gene title                                                                       | Symbol       | DBDE   |         |          |
|--------------------------|----------------------------------------------------------------------------------|--------------|--------|---------|----------|
|                          |                                                                                  |              | 10 ppm | 100 ppm | 1000 ppm |
| Up-regulated (669 genes) |                                                                                  |              |        |         |          |
| NM_001191992             | outer dense fiber of sperm tails 3B                                              | Odf3b        | 1.55   | 5.87    | 29.88    |
| BI288579                 | EST                                                                              | –            | 1.18   | 84.91   | 27.81    |
| NM_001106602             | deoxyguanosine kinase                                                            | Dguok        | 0.82   | 28.19   | 24.35    |
| XR_085573                | similar to mKIAA1783 protein                                                     | RGD1560214   | 0.63   | 9.81    | 15.39    |
| BM390363                 | EST                                                                              | –            | 0.82   | 2.20    | 12.46    |
| NM_031686                | sodium channel, voltage-gated, type VII, alpha                                   | Scn7a        | 0.89   | 7.34    | 11.60    |
| NM_001191598             | coiled-coil domain containing 113                                                | Ccdc113      | 1.33   | 2.08    | 11.31    |
| BE113493                 | EST                                                                              | –            | 0.64   | 12.08   | 11.20    |
| NM_021666                | triadin                                                                          | Trdn         | 1.38   | 5.40    | 10.88    |
| XM_002725158             | Hypothetical LOC290577                                                           | LOC290577    | 1.43   | 3.86    | 10.76    |
| BM386877                 | EST                                                                              | –            | 1.65   | 5.38    | 10.34    |
| NM_138884                | aldo-keto reductase family 1, member D1 (delta 4-3-ketosteroid-5-beta-reductase) | Akr1d1       | 1.64   | 10.18   | 10.25    |
| NM_022928                | G protein-coupled receptor kinase 4                                              | Grk4         | 0.61   | 4.57    | 9.86     |
| NM_031635                | fucosyltransferase 2 (secretor status included)                                  | Fut2         | 1.14   | 5.31    | 9.83     |
| XM_001061953             | Similar to paired immunoglobulin-like type 2 receptor alpha                      | LOC685020    | 1.72   | 10.32   | 9.74     |
| AW433528                 | EST                                                                              | –            | 1.02   | 5.75    | 9.32     |
| AI010736                 | EST                                                                              | –            | 1.13   | 6.35    | 9.10     |
| NM_024365                | 5-hydroxytryptamine (serotonin) receptor 6                                       | Htr6         | 1.15   | 14.58   | 8.69     |
| NM_001033073             | defensin alpha-related sequence 1                                                | Defa-rs1     | 1.05   | 6.78    | 8.61     |
| AI233574                 | EST                                                                              | –            | 1.74   | 4.29    | 8.20     |
| NM_001135807             | H2A histone family, member Y2                                                    | H2afy2       | 1.45   | 3.10    | 8.06     |
| NM_139184                | proline-rich glycoprotein (sgp158)                                               | Sgp158       | 1.77   | 6.77    | 7.93     |
| NM_001141935             | ATPase, class V, type 10A                                                        | Atp10a       | 1.50   | 7.61    | 7.67     |
| XM_001061900             | histone cluster 1, H4m                                                           | Hist1h4m     | 1.87   | 5.14    | 7.57     |
| NM_001106689             | Zinc finger protein 593                                                          | Znf593       | 1.01   | 5.07    | 7.45     |
| NM_001009920             | glutathione S-transferase Yc2 subunit                                            | Gsta5        | 1.03   | 2.42    | 7.39     |
| NM_001191758             | cache domain containing 1                                                        | Cachd1       | 1.19   | 6.53    | 7.22     |
| AA893390                 | EST                                                                              | –            | 0.54   | 2.68    | 7.19     |
| XM_001058380             | Hypothetical protein LOC680687                                                   | LOC680687    | 1.44   | 5.41    | 7.16     |
| BE119818                 | EST                                                                              | –            | 1.35   | 7.87    | 7.12     |
| XR_085609                | hypothetical LOC100363796                                                        | LOC100363796 | 0.92   | 2.13    | 7.07     |
| AI598332                 | EST                                                                              | –            | 1.02   | 2.19    | 6.96     |
| NM_147213                | alpha-2u globulin PGCL5                                                          | LOC259245    | 1.98   | 3.02    | 6.93     |
| NM_001033964             | 6-phosphofructo-2-kinase/fructose-2,6-biphosphatase 2                            | Pfkfb2       | 1.92   | 6.05    | 6.89     |
| BF410174                 | EST                                                                              | –            | 1.09   | 2.76    | 6.86     |
| XR_085950                | similar to Gene model 784                                                        | RGD1561693   | 1.51   | 5.62    | 6.85     |
| BI282568                 | keratinocyte differentiation associated protein                                  | Krtdap       | 1.18   | 5.46    | 6.83     |
| BF420118                 | EST                                                                              | –            | 1.07   | 4.91    | 6.74     |
| AI008553                 | EST                                                                              | –            | 1.88   | 3.64    | 6.71     |
| NM_001025417             | actin-like 7b                                                                    | Actl7b       | 1.66   | 6.41    | 6.71     |
| AA850953                 | EST                                                                              | –            | 0.78   | 10.18   | 6.61     |
| XM_001059437             | Methyl-CpG binding domain protein 4                                              | Mbd4         | 1.97   | 5.69    | 6.58     |
| NM_022213                | phosphoinositide-3-kinase, regulatory subunit 3 (gamma)                          | Pik3r3       | 0.86   | 2.82    | 6.50     |
| BF545930                 | EST                                                                              | –            | 0.89   | 3.20    | 6.27     |
| NM_001025661             | crumbs homolog 3                                                                 | Crb3         | 1.70   | 4.61    | 6.19     |
| XM_001081628             | SRY-box containing gene 9                                                        | Sox9         | 1.39   | 3.18    | 6.17     |

|              |                                                                              |              |      |       |      |
|--------------|------------------------------------------------------------------------------|--------------|------|-------|------|
| NM_181378    | cathepsin M                                                                  | Ctsm         | 1.12 | 7.07  | 6.14 |
| AA800583     | EST                                                                          | –            | 1.21 | 4.46  | 6.05 |
| NM_031688    | synuclein, gamma (breast cancer-specific protein 1)                          | Sncg         | 0.97 | 4.50  | 6.05 |
| NM_012873    | protamine 2                                                                  | Prm2         | 1.71 | 2.15  | 5.92 |
| BF409344     | EST                                                                          | –            | 1.15 | 2.94  | 5.84 |
| NM_053851    | calcium channel, voltage-dependent, beta 2 subunit                           | Cacnb2       | 1.42 | 3.55  | 5.70 |
| NM_133536    | RAB3C, member RAS oncogene family                                            | Rab3c        | 1.00 | 2.31  | 5.68 |
| AI763952     | EST                                                                          | –            | 1.08 | 6.14  | 5.66 |
| NM_001109289 | similar to RIKEN cDNA 1700012B09                                             | RGD1561795   | 1.05 | 2.20  | 5.59 |
| BM389765     | EST                                                                          | –            | 1.19 | 2.72  | 5.56 |
| AW536017     | EST                                                                          | –            | 1.49 | 3.52  | 5.55 |
| XM_001066684 | similar to ovostatin-2                                                       | RGD1565709   | 1.19 | 6.73  | 5.55 |
| NM_001013994 | REST corepressor 2                                                           | Rcor2        | 1.92 | 2.91  | 5.53 |
| XR_085857    | similar to Kiaa0575                                                          | RGD1564091   | 1.60 | 2.16  | 5.49 |
| NM_001025713 | similar to melanoma antigen family A, 10                                     | MGC114529    | 0.92 | 2.04  | 5.39 |
| NM_012566    | growth factor independent 1 transcription repressor                          | Gfi1         | 1.50 | 2.54  | 5.38 |
| AI639396     | EST                                                                          | –            | 1.07 | 4.82  | 5.37 |
| XM_578186    | Similar to C20orf118                                                         | RGD1561343   | 1.95 | 4.37  | 5.35 |
| NM_001108069 | serine/threonine kinase 11                                                   | Stk11        | 1.23 | 10.93 | 5.32 |
| NM_022628    | nephrosis 1 homolog                                                          | Nphs1        | 0.86 | 2.22  | 5.27 |
| BF399795     | EST                                                                          | –            | 1.38 | 4.48  | 5.26 |
| BF416438     | EST                                                                          | –            | 1.20 | 2.29  | 5.24 |
| BE113044     | EST                                                                          | –            | 1.09 | 2.57  | 5.22 |
| NM_023968    | neuropeptide Y receptor Y2                                                   | Npy2r        | 1.65 | 3.58  | 5.22 |
| NM_001106544 | dolichyl-phosphate mannosyltransferase polypeptide 1, catalytic subunit      | Dpm1         | 1.09 | 3.04  | 5.22 |
| NM_183334    | lactate dehydrogenase A-like 6B                                              | Ldhal6b      | 1.25 | 2.28  | 5.21 |
| NM_053753    | C-type lectin domain family 4, member f                                      | Clec4f       | 1.04 | 2.24  | 5.21 |
| AW528716     | EST                                                                          | –            | 0.88 | 3.32  | 5.19 |
| NM_022599    | synaptojanin 2 binding protein                                               | Synj2bp      | 0.88 | 7.00  | 5.14 |
| BE114170     | EST                                                                          | –            | 1.18 | 4.22  | 5.09 |
| BE115208     | EST                                                                          | –            | 1.15 | 3.73  | 5.04 |
| NM_017265    | hydroxy-delta-5-steroid dehydrogenase, 3 beta- and steroid delta-isomerase 6 | Hsd3b6       | 0.68 | 3.84  | 5.03 |
| BE102060     | EST                                                                          | –            | 1.56 | 4.90  | 5.02 |
| XM_002727806 | homeobox B2                                                                  | LOC100361765 | 1.50 | 2.36  | 5.01 |
| BF391102     | EST                                                                          | –            | 1.02 | 3.92  | 5.00 |
| AI556639     | EST                                                                          | –            | 1.76 | 2.47  | 4.98 |
| BG374590     | EST                                                                          | –            | 0.86 | 2.10  | 4.97 |
| NM_001108398 | Hyaluronan and proteoglycan link protein 4                                   | Hapln4       | 1.80 | 2.66  | 4.96 |
| BG375582     | EST                                                                          | –            | 1.12 | 2.30  | 4.96 |
| BE100632     | EST                                                                          | –            | 1.72 | 4.77  | 4.95 |
| XM_001059736 | similar to chromosome 9 open reading frame 5                                 | RGD1308958   | 0.66 | 3.28  | 4.90 |
| NM_012540    | cytochrome P450, family 1, subfamily a, polypeptide 1                        | Cyp1a1       | 0.92 | 3.18  | 4.89 |
| BF414994     | EST                                                                          | –            | 0.94 | 5.21  | 4.88 |
| NM_001109363 | RAB17, member RAS oncogene family                                            | Rab17        | 0.93 | 4.36  | 4.84 |
| NM_031813    | myosin binding protein H                                                     | Mybph        | 0.86 | 2.49  | 4.82 |
| NM_001109607 | histidine triad nucleotide binding protein 1                                 | Hint1        | 0.97 | 4.29  | 4.80 |
| XM_001067323 | Hypothetical protein LOC688535                                               | LOC688535    | 1.58 | 2.26  | 4.77 |
| AI044342     | EST                                                                          | –            | 1.01 | 3.95  | 4.77 |
| NM_001109124 | Coiled-coil domain containing 112                                            | Ccdc112      | 0.70 | 3.67  | 4.77 |
| NM_001109024 | DnaJ (Hsp40) homolog, subfamily C, member 30                                 | Dnajc30      | 1.49 | 2.12  | 4.77 |
| BF403436     | EST                                                                          | –            | 1.18 | 7.28  | 4.75 |
| NM_001033860 | carcinoembryonic antigen-related cell adhesion                               | Ceacam1      | 0.72 | 4.52  | 4.74 |

|              |                                                                                               |               |      |       |      |
|--------------|-----------------------------------------------------------------------------------------------|---------------|------|-------|------|
|              | molecule 1                                                                                    |               |      |       |      |
| NM_001083338 | translocase of outer mitochondrial membrane 40 homolog B                                      | Tomm40b       | 0.83 | 5.21  | 4.74 |
| BF393107     | EST                                                                                           | –             | 1.27 | 2.67  | 4.72 |
| NM_017180    | pleckstrin homology-like domain, family A, member 1                                           | Phlda1        | 1.32 | 2.91  | 4.72 |
| BF409856     | EST                                                                                           | –             | 1.54 | 4.94  | 4.70 |
| NM_031538    | CD8a molecule                                                                                 | Cd8a          | 0.98 | 2.40  | 4.70 |
| XM_001080252 | similar to Complement C5 precursor                                                            | RGD1308742    | 1.15 | 11.97 | 4.66 |
| BM385451     | EST                                                                                           | –             | 1.19 | 3.31  | 4.63 |
| AI059958     | EST                                                                                           | –             | 1.27 | 3.34  | 4.62 |
| NM_001108066 | AT rich interactive domain 3A (Bright like)                                                   | Arid3a        | 1.05 | 3.93  | 4.62 |
| NM_001025274 | splicing factor, arginine/serine-rich 18                                                      | Sfrs18        | 0.43 | 2.90  | 4.61 |
| NM_001108550 | periostin, osteoblast specific factor                                                         | Postn         | 0.51 | 5.03  | 4.60 |
| NM_019345    | solute carrier family 12 (sodium/chloride transporters), member 3                             | Slc12a3       | 0.53 | 4.51  | 4.59 |
| AI113313     | EST                                                                                           | –             | 1.43 | 7.47  | 4.55 |
| BE099423     | EST                                                                                           | –             | 1.40 | 3.54  | 4.52 |
| NM_181364    | thyrotropin releasing hormone receptor 2                                                      | Trhr2         | 1.10 | 3.08  | 4.47 |
| AI412543     | EST                                                                                           | –             | 0.95 | 4.54  | 4.45 |
| BF284535     | EST                                                                                           | –             | 1.41 | 4.57  | 4.44 |
| BE099881     | EST                                                                                           | –             | 0.88 | 2.34  | 4.44 |
| NM_022696    | Heart and neural crest derivatives expressed 2                                                | Hand2         | 0.88 | 4.27  | 4.42 |
| NM_001105920 | alkB, alkylation repair homolog 4                                                             | Alkbh4        | 1.16 | 2.44  | 4.42 |
| AI555247     | EST                                                                                           | –             | 1.02 | 4.64  | 4.42 |
| BE113549     | EST                                                                                           | –             | 1.28 | 4.81  | 4.38 |
| X76129       | EST                                                                                           | –             | 1.66 | 3.50  | 4.38 |
| BF408794     | EST                                                                                           | –             | 1.36 | 5.24  | 4.37 |
| BE097095     | EST                                                                                           | –             | 0.97 | 2.71  | 4.37 |
| NM_001100659 | CDC23 (cell division cycle 23)                                                                | Cdc23         | 1.97 | 4.07  | 4.36 |
| BF415420     | EST                                                                                           | –             | 0.85 | 2.37  | 4.35 |
| NM_173321    | hemiferrin, transferrin-like protein                                                          | LOC286987     | 1.03 | 3.34  | 4.35 |
| NM_001037357 | leukocyte immunoglobulin-like receptor, subfamily B (with TM and ITIM domains), member 3-like | Lilrb3l       | 1.50 | 5.33  | 4.32 |
| NM_001109892 | fibroblast growth factor receptor 2                                                           | Fgfr2         | 1.26 | 2.70  | 4.30 |
| NM_021659    | synaptotagmin VII                                                                             | Syt7          | 0.69 | 4.49  | 4.30 |
| NM_001166020 | E030032D13Rik gene                                                                            | E030032D13Rik | 1.67 | 4.31  | 4.29 |
| NM_001025115 | signal transducing adaptor family member 1                                                    | Stap1         | 1.18 | 2.43  | 4.27 |
| NM_001164396 | similar to 20-alpha-hydroxysteroid dehydrogenase                                              | RGD1564865    | 0.69 | 2.83  | 4.27 |
| BF405078     | EST                                                                                           | –             | 0.77 | 2.52  | 4.27 |
| NM_001079712 | lysine (K)-specific demethylase 4D                                                            | Kdm4d         | 1.54 | 2.38  | 4.27 |
| AA997287     | EST                                                                                           | –             | 1.62 | 3.41  | 4.26 |
| XM_001075943 | ER degradation enhancer, mannosidase alpha-like 1                                             | Edem1         | 1.49 | 4.15  | 4.21 |
| BF404359     | EST                                                                                           | –             | 1.98 | 3.42  | 4.21 |
| NM_021583    | prostaglandin E synthase                                                                      | Ptges         | 0.67 | 3.48  | 4.21 |
| NM_001101008 | Similar to Fgfr1 oncogene partner                                                             | LOC683722     | 1.54 | 2.58  | 4.19 |
| AI598405     | EST                                                                                           | –             | 0.41 | 4.45  | 4.19 |
| BF391867     | EST                                                                                           | –             | 1.41 | 2.73  | 4.18 |
| BE106653     | EST                                                                                           | –             | 1.25 | 3.88  | 4.18 |
| NM_031584    | solute carrier family 22 (organic cation transporter), member 2                               | Slc22a2       | 1.68 | 3.52  | 4.15 |
| BE097012     | EST                                                                                           | –             | 1.46 | 5.57  | 4.14 |
| AI716045     | EST                                                                                           | –             | 1.36 | 5.80  | 4.14 |
| XM_002729840 | hypothetical protein LOC100362109                                                             | LOC100362109  | 1.26 | 3.02  | 4.14 |
| AI639330     | EST                                                                                           | –             | 1.11 | 2.43  | 4.10 |
| XM_001061311 | Hypothetical protein LOC681335                                                                | LOC681335     | 1.47 | 3.25  | 4.09 |

|              |                                                                                                   |              |      |       |      |
|--------------|---------------------------------------------------------------------------------------------------|--------------|------|-------|------|
| NM_001017497 | submaxillary gland androgen regulated protein 3A                                                  | Smr3a        | 1.03 | 2.63  | 4.08 |
| BF410178     | EST                                                                                               | –            | 1.15 | 3.81  | 4.06 |
| NM_134336    | neuroigin 3                                                                                       | Nlgn3        | 1.62 | 3.28  | 4.04 |
| AI072279     | EST                                                                                               | –            | 1.10 | 2.85  | 4.03 |
| AI113047     | EST                                                                                               | –            | 1.17 | 3.08  | 4.03 |
| NM_001127659 | methionine-tRNA synthetase                                                                        | Mars         | 1.33 | 3.33  | 4.01 |
| NM_053914    | ST8 alpha-N-acetyl-neuraminide<br>alpha-2,8-sialyltransferase 4                                   | St8sia4      | 1.35 | 4.05  | 4.01 |
| NM_001108930 | pre-B lymphocyte 3                                                                                | Vpreb3       | 1.26 | 3.88  | 4.01 |
| BI850153     | EST                                                                                               | –            | 1.26 | 8.13  | 4.00 |
| BI298075     | EST                                                                                               | –            | 0.72 | 3.51  | 3.98 |
| XM_001076876 | obscurin, cytoskeletal calmodulin and<br>titin-interacting RhoGEF                                 | Obscn        | 1.13 | 3.66  | 3.98 |
| NM_013217    | myeloid/lymphoid or mixed-lineage leukemia<br>(trithorax homolog, Drosophila); translocated to, 4 | Mllt4        | 0.64 | 2.04  | 3.97 |
| BF564328     | EST                                                                                               | –            | 0.77 | 9.47  | 3.97 |
| BG380223     | EST                                                                                               | –            | 1.30 | 2.79  | 3.97 |
| AI030975     | EST                                                                                               | –            | 1.61 | 2.59  | 3.96 |
| NM_023026    | ArfGAP with GTPase domain, ankyrin repeat and<br>PH domain 2                                      | Agap2        | 0.95 | 4.54  | 3.96 |
| BF390840     | EST                                                                                               | –            | 1.33 | 3.07  | 3.94 |
| AI044004     | EST                                                                                               | –            | 1.39 | 2.00  | 3.94 |
| AI555848     | EST                                                                                               | –            | 1.31 | 2.08  | 3.94 |
| NM_173127    | protease, serine, 3                                                                               | Prss3        | 0.84 | 3.81  | 3.93 |
| BF405026     | EST                                                                                               | –            | 1.23 | 3.13  | 3.90 |
| BM389444     | EST                                                                                               | –            | 1.90 | 5.68  | 3.89 |
| XM_001054773 | ankyrin repeat domain 60                                                                          | Ankrd60      | 1.93 | 3.14  | 3.89 |
| BF288845     | EST                                                                                               | –            | 1.86 | 4.18  | 3.88 |
| NM_019166    | synaptogyrin 1                                                                                    | Syngn1       | 1.57 | 2.83  | 3.88 |
| NM_001191916 | Bromodomain adjacent to zinc finger domain, 1B                                                    | Baz1b        | 1.00 | 4.98  | 3.86 |
| NM_012996    | oxytocin, prepropeptide                                                                           | Oxt          | 0.91 | 4.78  | 3.86 |
| NM_001107194 | pogo transposable element with KRAB domain                                                        | Pogk         | 1.72 | 3.27  | 3.83 |
| AI548379     | EST                                                                                               | –            | 1.07 | 2.55  | 3.83 |
| AI235868     | EST                                                                                               | –            | 0.89 | 2.70  | 3.81 |
| NM_001100514 | centrosomal protein 76kDa                                                                         | Cep76        | 0.67 | 3.85  | 3.80 |
| NM_019183    | actin, alpha, cardiac muscle 1                                                                    | Actc1        | 1.20 | 2.40  | 3.79 |
| NM_001042579 | unc-13 homolog B                                                                                  | Unc13b       | 1.21 | 3.24  | 3.79 |
| NM_001107153 | ubiquitin specific peptidase 30                                                                   | Usp30        | 0.93 | 3.11  | 3.78 |
| BE098450     | EST                                                                                               | –            | 1.00 | 2.85  | 3.78 |
| NM_001082572 | Tripartite motif-containing 21                                                                    | Trim21       | 1.89 | 3.20  | 3.77 |
| NM_001107867 | ATPase, H transporting, lysosomal V1 subunit B1                                                   | Atp6v1b1     | 0.94 | 3.05  | 3.77 |
| NM_138975    | WW domain binding protein 2                                                                       | Wbp2         | 1.65 | 3.66  | 3.77 |
| NM_001039338 | Zinc finger, DHHC-type containing 5                                                               | Zdhhc5       | 0.79 | 3.64  | 3.76 |
| BI302053     | EST                                                                                               | –            | 1.35 | 2.80  | 3.76 |
| NM_031713    | leukocyte immunoglobulin-like receptor, subfamily<br>B (with TM and ITIM domains), member 3       | Lilrb3       | 0.97 | 10.23 | 3.76 |
| XM_002725948 | hypothetical protein LOC100360513                                                                 | LOC100360513 | 1.17 | 2.59  | 3.76 |
| BF284722     | EST                                                                                               | –            | 1.70 | 6.20  | 3.75 |
| AW915304     | EST                                                                                               | –            | 1.39 | 3.76  | 3.74 |
| NM_001100852 | zinc finger protein 746                                                                           | Znf746       | 0.72 | 3.93  | 3.74 |
| BF397286     | EST                                                                                               | –            | 1.00 | 2.61  | 3.73 |
| BF410377     | EST                                                                                               | –            | 1.83 | 2.24  | 3.73 |
| NM_001005877 | free fatty acid receptor 2                                                                        | Ffar2        | 1.09 | 5.88  | 3.73 |
| BI282060     | EST                                                                                               | –            | 1.21 | 2.19  | 3.73 |
| NM_031804    | cytokine inducible SH2-containing protein                                                         | Cish         | 1.84 | 2.64  | 3.72 |
| BE105421     | EST                                                                                               | –            | 0.61 | 2.84  | 3.72 |

|              |                                                                                        |              |      |      |      |
|--------------|----------------------------------------------------------------------------------------|--------------|------|------|------|
| AA956474     | EST                                                                                    | –            | 0.68 | 3.47 | 3.72 |
| NM_053789    | interleukin 17B                                                                        | Il17b        | 1.69 | 3.07 | 3.70 |
| AI043832     | EST                                                                                    | –            | 0.97 | 2.44 | 3.69 |
| NM_001191725 | Myotubularin related protein 1                                                         | Mtmr1        | 1.64 | 2.10 | 3.69 |
| NM_017102    | solute carrier family 2 (facilitated glucose transporter), member 3                    | Slc2a3       | 1.98 | 4.42 | 3.68 |
| AI044912     | EST                                                                                    | –            | 1.24 | 2.96 | 3.68 |
| BF396101     | EST                                                                                    | –            | 1.00 | 3.86 | 3.68 |
| NM_001110099 | ret proto-oncogene                                                                     | Ret          | 1.67 | 4.48 | 3.67 |
| NM_147144    | cancer susceptibility candidate 3                                                      | Casc3        | 1.26 | 2.82 | 3.67 |
| AA963295     | EST                                                                                    | –            | 1.13 | 4.60 | 3.65 |
| NM_031739    | potassium voltage-gated channel, Shal-related subfamily, member 3                      | Kcnd3        | 0.96 | 3.75 | 3.64 |
| NM_001191692 | leucine rich repeat containing 16A                                                     | Lrrc16a      | 1.18 | 2.30 | 3.63 |
| AA946053     | EST                                                                                    | –            | 0.95 | 3.32 | 3.63 |
| NM_172157    | AT rich interactive domain 1B (Swi1 like)                                              | Arid1b       | 1.56 | 5.29 | 3.61 |
| XM_001075996 | ring finger protein 207                                                                | Rnf207       | 0.93 | 3.31 | 3.60 |
| AI555088     | EST                                                                                    | –            | 1.00 | 2.37 | 3.60 |
| NM_001107087 | organic solute transporter alpha                                                       | Ostalpha     | 1.44 | 2.76 | 3.59 |
| BF399291     | EST                                                                                    | –            | 1.50 | 3.38 | 3.59 |
| NM_170667    | Relaxin 3                                                                              | Rln3         | 1.06 | 3.19 | 3.58 |
| NM_023103    | murinoglobulin 1                                                                       | Mug1         | 1.80 | 3.00 | 3.57 |
| AW527295     | EST                                                                                    | –            | 1.04 | 2.01 | 3.56 |
| BF401303     | EST                                                                                    | –            | 1.90 | 4.34 | 3.56 |
| AI030318     | EST                                                                                    | –            | 1.29 | 2.60 | 3.55 |
| NM_001102403 | seminal vesicle secretory protein 6                                                    | Svs6         | 1.75 | 3.15 | 3.52 |
| NM_001011947 | retinoic acid induced 14                                                               | Rai14        | 1.35 | 2.11 | 3.51 |
| BE114399     | EST                                                                                    | –            | 0.88 | 2.94 | 3.51 |
| NM_012531    | catechol-O-methyltransferase                                                           | Comt         | 0.97 | 3.86 | 3.50 |
| XM_002726882 | rCG49027-like                                                                          | LOC100362836 | 1.71 | 3.52 | 3.50 |
| BF396390     | EST                                                                                    | –            | 0.99 | 3.47 | 3.50 |
| NM_022684    | BH3 interacting domain death agonist                                                   | Bid          | 1.02 | 2.80 | 3.48 |
| BF415758     | EST                                                                                    | –            | 0.86 | 3.96 | 3.47 |
| NM_001191100 | Similar to RNA binding motif protein 24                                                | LOC690139    | 1.45 | 3.04 | 3.46 |
| BE098827     | EST                                                                                    | –            | 0.87 | 3.25 | 3.46 |
| NM_031533    | UDP glycosyltransferase 2 family, polypeptide B                                        | Ugt2b        | 1.26 | 3.18 | 3.46 |
| XM_001055673 | Similar to SWI/SNF-related matrix-associated actin-dependent regulator of chromatin c2 | LOC685179    | 1.53 | 2.29 | 3.44 |
| BI296600     | EST                                                                                    | –            | 1.63 | 2.20 | 3.43 |
| NM_001108382 | coiled-coil domain containing 25                                                       | Ccdc25       | 0.90 | 2.40 | 3.43 |
| AFFX-TrpnX-3 | EST                                                                                    | –            | 1.43 | 5.29 | 3.42 |
| BF405278     | EST                                                                                    | –            | 0.88 | 2.57 | 3.42 |
| U39571       | EST                                                                                    | –            | 0.80 | 2.47 | 3.42 |
| BF401158     | EST                                                                                    | –            | 0.71 | 2.19 | 3.41 |
| NM_001106207 | Myc target 1                                                                           | Myct1        | 1.09 | 2.77 | 3.41 |
| BF405941     | EST                                                                                    | –            | 1.06 | 4.26 | 3.41 |
| NM_053953    | interleukin 1 receptor, type II                                                        | Il1r2        | 0.85 | 2.57 | 3.40 |
| XM_001069222 | Similar to KIAA1549 protein                                                            | RGD1306271   | 1.30 | 3.23 | 3.38 |
| NM_012524    | CCAAT/enhancer binding protein (C/EBP), alpha                                          | Cebpa        | 0.95 | 2.63 | 3.36 |
| BF386426     | EST                                                                                    | –            | 0.99 | 2.50 | 3.35 |
| NM_017254    | 5-hydroxytryptamine (serotonin) receptor 2A                                            | Htr2a        | 1.13 | 3.26 | 3.34 |
| BF410005     | EST                                                                                    | –            | 0.52 | 4.13 | 3.33 |
| NM_001106319 | CysteinyI-tRNA synthetase                                                              | Cars         | 1.15 | 4.23 | 3.31 |
| NM_017093    | v-akt murine thymoma viral oncogene homolog 2                                          | Akt2         | 1.07 | 2.91 | 3.30 |
| AI072237     | EST                                                                                    | –            | 1.16 | 2.27 | 3.29 |

|              |                                                          |            |      |       |      |
|--------------|----------------------------------------------------------|------------|------|-------|------|
| NM_001107804 | Molybdenum cofactor synthesis 3                          | Mocs3      | 1.12 | 3.19  | 3.28 |
| NM_153621    | disabled homolog 1                                       | Dab1       | 0.45 | 2.85  | 3.28 |
| NM_001008831 | RT1 class II, locus Ba                                   | RT1-Ba     | 1.25 | 2.26  | 3.27 |
| NM_031538    | CD8a molecule                                            | Cd8a       | 0.99 | 4.37  | 3.27 |
| AI144892     | EST                                                      | –          | 1.32 | 4.44  | 3.26 |
| NM_012849    | gastrin                                                  | Gast       | 1.10 | 3.30  | 3.26 |
| NR_026689    | hypothetical protein LOC686120                           | LOC686120  | 1.55 | 2.75  | 3.26 |
| NM_001008297 | similar to DNA segment, Chr 14, ERATO Doi 449, expressed | RGD1305689 | 1.01 | 3.20  | 3.25 |
| NM_017267    | Translocase of inner mitochondrial membrane 44 homolog   | Timm44     | 1.26 | 5.17  | 3.25 |
| BG373668     | EST                                                      | –          | 1.86 | 4.09  | 3.25 |
| XR_005459    | similar to inter-alpha-inhibitor H2 chain                | LOC498793  | 1.58 | 2.06  | 3.25 |
| NM_139085    | cystatin 11                                              | Cst11      | 1.26 | 3.27  | 3.24 |
| NM_012715    | adrenomedullin                                           | Adm        | 1.22 | 2.01  | 3.24 |
| AI555339     | EST                                                      | –          | 1.48 | 2.29  | 3.23 |
| NM_001108463 | radial spokehead-like 2                                  | Rshl2      | 1.75 | 2.87  | 3.22 |
| AI638966     | EST                                                      | –          | 0.78 | 2.71  | 3.22 |
| NM_173135    | amiloride-sensitive cation channel 3                     | Accn3      | 0.91 | 2.06  | 3.21 |
| NM_001010970 | amylase, alpha 1A                                        | Amy1a      | 0.39 | 23.87 | 3.21 |
| NM_001008758 | keratin 34                                               | Krt34      | 1.30 | 2.57  | 3.21 |
| NM_001106506 | nephronophthisis 1 (juvenile) homolog                    | Nphp1      | 1.50 | 2.07  | 3.20 |
| BF404936     | EST                                                      | –          | 1.03 | 2.73  | 3.20 |
| NM_001013159 | formin binding protein 4                                 | Fnbp4      | 1.77 | 2.27  | 3.20 |
| NM_001127652 | creatine kinase, mitochondrial 2, sarcomeric             | Ckmt2      | 1.30 | 2.36  | 3.19 |
| BF288361     | EST                                                      | –          | 0.93 | 2.41  | 3.19 |
| NM_021659    | synaptotagmin VII                                        | Syt7       | 1.04 | 2.92  | 3.19 |
| AI555284     | EST                                                      | –          | 1.36 | 4.89  | 3.18 |
| NM_001012355 | Sumo1/sentrin/SMT3 specific peptidase 8                  | Senp8      | 0.95 | 2.42  | 3.18 |
| NM_021584    | doublecortin-like kinase 1                               | Delk1      | 1.11 | 3.98  | 3.18 |
| BF410736     | EST                                                      | –          | 0.67 | 3.05  | 3.18 |
| NM_207605    | SH2 domain protein 2A                                    | Sh2d2a     | 1.19 | 2.84  | 3.17 |
| BE110921     | EST                                                      | –          | 1.32 | 2.04  | 3.17 |
| BM385125     | EST                                                      | –          | 0.73 | 3.06  | 3.17 |
| BG378715     | EST                                                      | –          | 0.94 | 2.36  | 3.17 |
| NM_134327    | Cd69 molecule                                            | Cd69       | 1.23 | 2.16  | 3.16 |
| AW532385     | EST                                                      | –          | 0.82 | 2.97  | 3.16 |
| BI273836     | EST                                                      | –          | 1.75 | 2.03  | 3.16 |
| NM_053291    | phosphoglycerate kinase 1                                | Pgk1       | 0.56 | 4.09  | 3.15 |
| NM_001012181 | E74-like factor 2                                        | Elf2       | 1.29 | 2.19  | 3.15 |
| BF291108     | EST                                                      | –          | 1.82 | 2.74  | 3.14 |
| NM_012568    | glycine receptor, alpha 2                                | Gla2       | 1.84 | 2.42  | 3.14 |
| NM_022393    | C-type lectin domain family 10, member A                 | Clec10a    | 1.39 | 3.45  | 3.13 |
| AA955985     | EST                                                      | –          | 1.12 | 2.45  | 3.13 |
| NM_001108238 | ankyrin repeat domain 12                                 | Ankrd12    | 0.86 | 3.47  | 3.12 |
| BI292034     | EST                                                      | –          | 1.43 | 2.46  | 3.12 |
| NR_002151    | RT1 class I, locus T24, gene 2                           | RT1-T24-2  | 1.43 | 5.16  | 3.11 |
| XM_001069306 | zinc finger CCCH-type, antiviral 1-like                  | Zc3hav11   | 1.52 | 2.83  | 3.11 |
| NM_001105727 | proteasome (prosome, macropain) subunit, beta type 5     | Psmb5      | 1.00 | 3.33  | 3.11 |
| BF401649     | EST                                                      | –          | 1.38 | 2.94  | 3.10 |
| BF419542     | EST                                                      | –          | 1.57 | 3.79  | 3.09 |
| NM_001108880 | BARX homeobox 1                                          | Barx1      | 1.17 | 3.72  | 3.09 |
| NM_001009497 | killer cell lectin-like receptor, subfamily A, member 17 | Klra17     | 0.51 | 3.19  | 3.09 |

|              |                                                         |              |      |      |      |
|--------------|---------------------------------------------------------|--------------|------|------|------|
| BF400860     | EST                                                     | –            | 1.14 | 2.48 | 3.09 |
| AI013206     | EST                                                     | –            | 1.69 | 2.81 | 3.08 |
| NM_173300    | olfactory receptor 1271                                 | Olr1271      | 1.68 | 4.11 | 3.08 |
| NM_001010970 | amylase, alpha 1A                                       | Amy1a        | 1.20 | 8.40 | 3.08 |
| NM_013193    | neurofibromin 2                                         | Nf2          | 1.61 | 3.08 | 3.08 |
| AI072079     | EST                                                     | –            | 1.67 | 2.34 | 3.07 |
| XM_001078877 | genetic suppressor element 1                            | Gse1         | 0.95 | 2.79 | 3.07 |
| BM389874     | EST                                                     | –            | 1.38 | 3.03 | 3.06 |
| NM_001134341 | ischemia related factor NYW-1                           | Nyw1         | 0.77 | 2.76 | 3.06 |
| NM_024401    | advillin                                                | Avil         | 1.76 | 2.74 | 3.06 |
| NM_001009494 | killer cell lectin-like receptor, subfamily A, member 5 | Klra5        | 1.61 | 2.31 | 3.05 |
| NM_022933    | chromodomain helicase DNA binding protein 8             | Chd8         | 1.16 | 5.84 | 3.04 |
| AI169247     | EST                                                     | –            | 0.95 | 2.45 | 3.04 |
| AW433964     | EST                                                     | –            | 0.90 | 2.16 | 3.03 |
| NM_153621    | Disabled homolog 1                                      | Dab1         | 0.91 | 2.61 | 3.02 |
| BF394624     | EST                                                     | –            | 0.70 | 2.04 | 3.02 |
| NM_001173434 | hemochromatosis                                         | Hfe          | 1.16 | 2.15 | 3.01 |
| AW534610     | EST                                                     | –            | 0.77 | 3.07 | 3.01 |
| NM_031545    | natriuretic peptide precursor B                         | Nppb         | 0.51 | 2.36 | 3.01 |
| BM391972     | EST                                                     | –            | 1.76 | 3.92 | 3.00 |
| NM_173130    | vomer nasal 2 receptor, 27                              | Vom2r27      | 1.25 | 3.70 | 3.00 |
| BF396142     | EST                                                     | –            | 1.33 | 2.53 | 2.99 |
| NM_031140    | vimentin                                                | Vim          | 1.65 | 2.82 | 2.99 |
| NM_001033958 | alpha-2u globulin PGCL4                                 | Obp3         | 1.68 | 2.79 | 2.99 |
| NM_022253    | Csk binding protein                                     | Cbp          | 0.78 | 3.54 | 2.98 |
| NM_024160    | cytochrome b-245, alpha polypeptide                     | Cyba         | 0.93 | 3.21 | 2.98 |
| XM_002725069 | hypothetical protein LOC100364843                       | LOC100364843 | 1.11 | 3.10 | 2.97 |
| NM_053871    | signal recognition particle 54a                         | Srp54a       | 1.48 | 2.79 | 2.96 |
| NM_001109530 | SAM pointed domain containing ets transcription factor  | Spdef        | 1.22 | 2.09 | 2.96 |
| AI231651     | EST                                                     | –            | 0.97 | 2.31 | 2.96 |
| XM_001078167 | Similar to CG9646-PA                                    | RGD1304694   | 1.12 | 4.83 | 2.95 |
| AA963477     | EST                                                     | –            | 0.97 | 2.33 | 2.94 |
| NM_001107291 | inter-alpha trypsin inhibitor, heavy chain 1            | Itih1        | 0.88 | 3.37 | 2.94 |
| BF419668     | EST                                                     | –            | 1.17 | 2.18 | 2.94 |
| XM_001061208 | similar to ribosomal protein S12                        | LOC680988    | 1.58 | 2.03 | 2.94 |
| BF290383     | EST                                                     | –            | 1.15 | 3.06 | 2.94 |
| NM_031141    | paired box 8                                            | Pax8         | 1.27 | 2.30 | 2.94 |
| NM_199107    | Glycosyltransferase-like 1B                             | Gylt1b       | 1.19 | 2.22 | 2.93 |
| NM_001109070 | golgi transport 1 homolog A                             | Golt1a       | 1.60 | 2.23 | 2.93 |
| NM_139041    | mucin 13, cell surface associated                       | Muc13        | 1.03 | 2.36 | 2.92 |
| BF393928     | EST                                                     | –            | 0.99 | 2.42 | 2.92 |
| NM_181365    | Kv channel interacting protein 4                        | Kcnip4       | 1.78 | 3.43 | 2.92 |
| NM_207593    | prostatic steroid-binding protein C2                    | Psbpc2       | 0.75 | 2.80 | 2.91 |
| NM_053312    | dihydroipoamide branched chain transacylase E2          | Dbt          | 0.86 | 2.14 | 2.91 |
| NM_001009624 | Spindle and kinetochore associated complex subunit 2    | Ska2         | 1.15 | 4.34 | 2.90 |
| BE101809     | EST                                                     | –            | 0.94 | 2.30 | 2.89 |
| XR_007893    | similar to TICAM-1                                      | LOC363328    | 1.07 | 2.31 | 2.88 |
| NM_019321    | mast cell protease 4                                    | Mcpt4        | 1.06 | 6.31 | 2.88 |
| AI072437     | EST                                                     | –            | 0.65 | 2.84 | 2.88 |
| NM_013097    | deoxyribonuclease I                                     | Dnase1       | 1.40 | 3.95 | 2.87 |
| BF394493     | EST                                                     | –            | 1.13 | 2.37 | 2.87 |
| NM_001034931 | polycystic kidney and hepatic disease 1-like 1          | Pkhd111      | 0.84 | 2.20 | 2.87 |

|              |                                                                                                                                         |                 |      |      |      |
|--------------|-----------------------------------------------------------------------------------------------------------------------------------------|-----------------|------|------|------|
| NM_022235    | potassium voltage-gated channel, Isk-related subfamily, gene 3                                                                          | Kcne3           | 0.92 | 2.91 | 2.87 |
| AA859889     | EST                                                                                                                                     | –               | 1.93 | 3.38 | 2.86 |
| AI071526     | EST                                                                                                                                     | –               | 1.76 | 2.37 | 2.86 |
| NM_138504    | oxidative stress induced growth inhibitor 1                                                                                             | Osgin1          | 1.13 | 3.08 | 2.85 |
| NM_001025411 | DnaJ (Hsp40) homolog, subfamily A, member 4                                                                                             | Dnaja4          | 1.18 | 3.96 | 2.85 |
| AI229471     | EST                                                                                                                                     | –               | 1.76 | 2.08 | 2.85 |
| XR_009042    | similar to RGD, leucine-rich repeat, tropomodulin and proline-rich containing protein                                                   | RGD1562390      | 1.85 | 2.37 | 2.84 |
| AI763894     | EST                                                                                                                                     | –               | 1.00 | 2.13 | 2.84 |
| NM_053640    | leukotriene B4 receptor 2                                                                                                               | Ltb4r2          | 1.35 | 2.89 | 2.84 |
| XM_001055013 | leucine-rich repeats and immunoglobulin-like domains 3                                                                                  | Lrig3           | 1.13 | 2.15 | 2.83 |
| BE108754     | EST                                                                                                                                     | –               | 1.10 | 3.07 | 2.83 |
| NM_001108559 | PRP3 pre-mRNA processing factor 3 homolog                                                                                               | Prpf3           | 1.36 | 5.13 | 2.82 |
| AI045029     | EST                                                                                                                                     | –               | 1.39 | 3.17 | 2.82 |
| NM_020097    | exostoses (multiple)-like 3                                                                                                             | Extl3           | 0.97 | 2.02 | 2.82 |
| NM_001109541 | DnaJ (Hsp40) homolog, subfamily B, member 2                                                                                             | Dnajb2          | 1.03 | 5.85 | 2.81 |
| NM_053644    | cadherin 23 (otocadherin)                                                                                                               | Cdh23           | 0.80 | 2.47 | 2.80 |
| NM_017047    | solute carrier family 10 (sodium/bile acid cotransporter family), member 1                                                              | Slc10a1         | 0.72 | 2.42 | 2.80 |
| XR_006158    | Similar to Myeloid/lymphoid or mixed-lineage leukemia protein 3 homolog (Histone-lysine N-methyltransferase, H3 lysine-4 specific MLL3) | LOC502710       | 0.93 | 2.38 | 2.79 |
| NM_031588    | neuregulin 1                                                                                                                            | Nrg1            | 0.82 | 2.44 | 2.79 |
| AI578317     | EST                                                                                                                                     | –               | 1.49 | 2.10 | 2.79 |
| BF400683     | EST                                                                                                                                     | –               | 0.84 | 5.55 | 2.79 |
| AI072041     | EST                                                                                                                                     | –               | 0.95 | 4.60 | 2.78 |
| AW921479     | EST                                                                                                                                     | –               | 1.73 | 2.45 | 2.77 |
| BM390376     | EST                                                                                                                                     | –               | 0.98 | 3.45 | 2.76 |
| BF403678     | EST                                                                                                                                     | –               | 1.12 | 3.00 | 2.76 |
| AW142608     | EST                                                                                                                                     | –               | 1.01 | 2.76 | 2.75 |
| AA957926     | EST                                                                                                                                     | –               | 1.02 | 3.08 | 2.74 |
| NM_001126303 | ubiquitin specific protease 43                                                                                                          | Usp43_predicted | 0.84 | 2.70 | 2.74 |
| NM_212459    | ADP-ribosylation factor-like 9                                                                                                          | Arl9            | 0.36 | 2.13 | 2.74 |
| AI045025     | EST                                                                                                                                     | –               | 0.68 | 2.28 | 2.74 |
| AI071595     | EST                                                                                                                                     | –               | 0.88 | 2.49 | 2.73 |
| BF394024     | EST                                                                                                                                     | –               | 1.24 | 2.80 | 2.72 |
| NM_001130551 | similar to secreted Ly6/uPAR related protein 2                                                                                          | RGD1308195      | 0.85 | 2.33 | 2.72 |
| NM_017078    | cholinergic receptor, nicotinic, alpha 5                                                                                                | Chrna5          | 1.18 | 2.19 | 2.72 |
| NM_053613    | reticulon 4 receptor                                                                                                                    | Rtn4r           | 0.99 | 2.88 | 2.72 |
| NM_053724    | glycine receptor, alpha 3                                                                                                               | Glr3            | 1.15 | 2.05 | 2.71 |
| AI600230     | EST                                                                                                                                     | –               | 1.17 | 3.77 | 2.71 |
| BE113971     | EST                                                                                                                                     | –               | 0.96 | 2.44 | 2.71 |
| BF410456     | EST                                                                                                                                     | –               | 1.17 | 2.49 | 2.70 |
| AW530928     | EST                                                                                                                                     | –               | 1.02 | 4.05 | 2.70 |
| NM_001002827 | Notch homolog 4                                                                                                                         | Notch4          | 1.10 | 4.25 | 2.70 |
| NM_001108652 | similar to hypothetical protein DKFZp761D0211                                                                                           | RGD1306151      | 1.18 | 2.73 | 2.70 |
| AT005664     | EST                                                                                                                                     | –               | 1.03 | 2.20 | 2.69 |
| AW251681     | EST                                                                                                                                     | –               | 1.16 | 3.92 | 2.69 |
| NM_012511    | ATPase, Cu <sup>++</sup> transporting, beta polypeptide                                                                                 | Atp7b           | 1.34 | 2.84 | 2.69 |
| NM_001011892 | serine (or cysteine) peptidase inhibitor, clade F, member 2                                                                             | Serpinf2        | 1.10 | 2.20 | 2.69 |
| AI103351     | EST                                                                                                                                     | –               | 0.43 | 2.22 | 2.68 |
| NM_001107823 | growth factor independent 1B transcription repressor                                                                                    | Gfi1b           | 0.95 | 2.44 | 2.68 |
| BF412962     | EST                                                                                                                                     | –               | 1.60 | 4.74 | 2.67 |



|              |                                                                                                   |              |      |      |      |
|--------------|---------------------------------------------------------------------------------------------------|--------------|------|------|------|
| BF400135     | EST                                                                                               | –            | 0.70 | 2.68 | 2.67 |
| BE097058     | EST                                                                                               | –            | 0.74 | 3.03 | 2.67 |
| XM_002725301 | TAF3 RNA polymerase II, TATA box binding protein (TBP)-associated factor                          | LOC100360100 | 1.52 | 3.62 | 2.67 |
| NM_019359    | Calponin 3, acidic                                                                                | Cnn3         | 1.11 | 3.64 | 2.67 |
| AI232217     | EST                                                                                               | –            | 1.04 | 2.65 | 2.67 |
| NM_012553    | chymotrypsin-like elastase family, member 2A                                                      | Cela2a       | 0.67 | 2.63 | 2.67 |
| NM_001004022 | keratin 15                                                                                        | Krt15        | 1.17 | 2.17 | 2.67 |
| NM_001025641 | pregnancy-specific glycoprotein 29                                                                | Psg29        | 1.67 | 4.16 | 2.67 |
| AI385279     | EST                                                                                               | –            | 1.32 | 2.67 | 2.66 |
| BF387484     | EST                                                                                               | –            | 0.93 | 2.48 | 2.66 |
| BF404369     | EST                                                                                               | –            | 0.99 | 2.13 | 2.66 |
| NM_001013065 | gametogenetin                                                                                     | Ggn          | 1.09 | 2.70 | 2.65 |
| NM_138861    | Prolactin family 2, subfamily b, member 1                                                         | Prl2b1       | 0.89 | 2.80 | 2.65 |
| NM_012944    | dopamine receptor D4                                                                              | Drd4         | 0.46 | 4.21 | 2.64 |
| AW917217     | EST                                                                                               | –            | 0.95 | 4.17 | 2.64 |
| XM_001070946 | similar to class-alpha glutathione S-transferase                                                  | RGD1562107   | 1.36 | 2.26 | 2.64 |
| NM_012813    | ST8 alpha-N-acetyl-neuraminidase alpha-2,8-sialyltransferase 1                                    | St8sia1      | 1.02 | 3.22 | 2.64 |
| XM_002727399 | paired immunoglobulin-like type 2 receptor alpha                                                  | Pilra        | 1.23 | 2.06 | 2.63 |
| NM_001013098 | dehydrogenase/reductase (SDR family) member 7                                                     | Dhrs7        | 0.57 | 2.42 | 2.63 |
| BE120674     | EST                                                                                               | –            | 0.96 | 2.31 | 2.63 |
| NM_001017480 | homeo box B7                                                                                      | Hoxb7        | 1.18 | 2.74 | 2.62 |
| NM_001030029 | COMM domain containing 7                                                                          | Comm7        | 1.00 | 2.21 | 2.62 |
| NM_019292    | carbonic anhydrase 3                                                                              | Car3         | 1.15 | 2.01 | 2.61 |
| NM_001106972 | Similar to CG4768-PA                                                                              | RGD1309748   | 1.49 | 2.70 | 2.61 |
| NM_001108271 | LOC360508                                                                                         | RGD1306625   | 1.72 | 2.24 | 2.61 |
| BF404505     | EST                                                                                               | –            | 1.00 | 2.79 | 2.60 |
| BE106136     | EST                                                                                               | –            | 0.99 | 2.19 | 2.60 |
| NM_080768    | tachykinin receptor 2                                                                             | Tacr2        | 1.42 | 2.37 | 2.60 |
| NM_022631    | wingless-type MMTV integration site family, member 5A                                             | Wnt5a        | 1.72 | 2.38 | 2.60 |
| NM_001107422 | THAP domain containing 11                                                                         | Thap11       | 1.30 | 2.19 | 2.60 |
| BI296703     | EST                                                                                               | –            | 1.38 | 2.89 | 2.59 |
| NM_001135173 | T-kininogenase                                                                                    | Klk1c10      | 0.75 | 2.43 | 2.59 |
| NM_019255    | calcium channel, voltage-dependent, gamma subunit 1                                               | Cacng1       | 1.90 | 4.50 | 2.59 |
| AI235078     | EST                                                                                               | –            | 1.17 | 2.16 | 2.59 |
| BF413876     | EST                                                                                               | –            | 0.77 | 2.35 | 2.58 |
| NM_001135157 | myosin, heavy chain 2, skeletal muscle                                                            | Myh2         | 1.49 | 3.72 | 2.57 |
| XM_002727932 | F-box and WD repeat domain containing 7-like                                                      | LOC100361588 | 0.93 | 3.01 | 2.56 |
| BF403846     | EST                                                                                               | –            | 0.95 | 2.98 | 2.56 |
| BI300244     | EST                                                                                               | –            | 0.87 | 2.97 | 2.56 |
| AI069951     | EST                                                                                               | –            | 1.08 | 2.06 | 2.55 |
| NM_053822    | S100 calcium binding protein A8                                                                   | S100a8       | 1.74 | 2.01 | 2.55 |
| NM_001004131 | Keratin 24                                                                                        | Krt24        | 1.67 | 2.61 | 2.55 |
| NM_022239    | neuromedin U                                                                                      | Nmu          | 0.60 | 2.89 | 2.55 |
| NM_053706    | doublesex and mab-3 related transcription factor 1                                                | Dmrt1        | 0.77 | 2.88 | 2.55 |
| NM_021586    | latent transforming growth factor beta binding protein 2                                          | Ltbp2        | 0.88 | 2.30 | 2.54 |
| XM_002725935 | solute carrier family 25 (mitochondrial carrier; adenine nucleotide translocator), member 31-like | LOC100364813 | 1.00 | 2.49 | 2.54 |
| NM_001106257 | myosin binding protein C, fast-type                                                               | Mybpc2       | 1.00 | 2.53 | 2.54 |
| AA859673     | EST                                                                                               | –            | 0.89 | 3.20 | 2.54 |
| NM_001109556 | ovary-specific acidic protein                                                                     | Osap         | 1.22 | 2.11 | 2.53 |
| BF418099     | EST                                                                                               | –            | 1.20 | 2.52 | 2.53 |

|              |                                                                                                |              |      |      |      |
|--------------|------------------------------------------------------------------------------------------------|--------------|------|------|------|
| BF405181     | EST                                                                                            | –            | 1.19 | 2.09 | 2.53 |
| NM_001106196 | UDP-N-acetyl-alpha-D-galactosamine:polypeptide N-acetylgalactosaminyltransferase 2 (GalNAc-T2) | Galnt2       | 0.93 | 3.57 | 2.53 |
| NM_020081    | CD86 molecule                                                                                  | Cd86         | 1.23 | 2.34 | 2.53 |
| NM_022582    | lectin, galactoside-binding, soluble, 7                                                        | Lgals7       | 1.99 | 3.22 | 2.53 |
| H33294       | EST                                                                                            | –            | 1.11 | 2.78 | 2.53 |
| NM_001034943 | solute carrier family 22 (organic anion/urate transporter), member 12                          | Slc22a12     | 1.54 | 2.78 | 2.53 |
| NM_001106067 | glycosyltransferase 25 domain containing 1                                                     | Glt25d1      | 0.74 | 2.77 | 2.53 |
| AA893234     | EST                                                                                            | –            | 1.10 | 2.45 | 2.52 |
| BF561222     | EST                                                                                            | –            | 1.05 | 3.86 | 2.52 |
| AI071607     | EST                                                                                            | –            | 1.72 | 2.12 | 2.52 |
| NM_001012047 | biotinidase                                                                                    | Btd          | 1.68 | 2.83 | 2.52 |
| NM_001024764 | solute carrier family 36 (proton/amino acid symporter), member 3                               | Slc36a3      | 1.48 | 3.57 | 2.52 |
| NM_053419    | synergin, gamma                                                                                | Synrg        | 1.49 | 2.38 | 2.52 |
| NM_001107033 | T-box 2                                                                                        | Tbx2         | 1.64 | 2.83 | 2.52 |
| NM_001111115 | brain-enriched guanylate kinase-associated                                                     | Begain       | 1.31 | 2.24 | 2.51 |
| NM_012530    | creatine kinase, muscle                                                                        | Ckm          | 1.31 | 2.17 | 2.51 |
| AI071958     | EST                                                                                            | –            | 0.98 | 2.48 | 2.50 |
| AI599545     | EST                                                                                            | –            | 1.14 | 2.34 | 2.50 |
| XM_001076431 | sin3A-binding protein, SAP25                                                                   | Sap25        | 1.33 | 2.28 | 2.50 |
| NM_145088    | mammary cancer associated protein RMT-1                                                        | Rmt1         | 1.68 | 2.23 | 2.50 |
| NM_031632    | caspase 9, apoptosis-related cysteine peptidase                                                | Casp9        | 1.60 | 2.24 | 2.50 |
| NM_001109912 | TSC22 domain family, member 1                                                                  | Tsc22d1      | 0.86 | 3.22 | 2.49 |
| NM_012596    | leptin receptor                                                                                | Lepr         | 1.46 | 2.10 | 2.49 |
| NM_138874    | casein alpha s1                                                                                | Csn1s1       | 1.33 | 2.15 | 2.49 |
| BF393838     | EST                                                                                            | –            | 1.34 | 2.48 | 2.49 |
| NM_001006990 | cell adhesion molecule JCAM                                                                    | LOC304000    | 1.21 | 2.89 | 2.49 |
| NM_012718    | androgen regulated 20 kDa protein                                                              | Andpro       | 1.12 | 3.15 | 2.48 |
| NM_001106841 | Mitochondrial translation optimization 1 homolog                                               | Mto1         | 1.90 | 2.15 | 2.48 |
| NM_138977    | prokineticin receptor 1                                                                        | Prokr1       | 1.02 | 2.51 | 2.48 |
| NM_012879    | solute carrier family 2 (facilitated glucose transporter), member 2                            | Slc2a2       | 1.16 | 2.06 | 2.48 |
| BM391896     | EST                                                                                            | –            | 0.72 | 2.13 | 2.47 |
| AA893682     | EST                                                                                            | –            | 1.09 | 2.46 | 2.47 |
| BF401574     | EST                                                                                            | –            | 0.82 | 3.30 | 2.47 |
| NM_001107133 | GRB10 interacting GYF protein 1                                                                | Gigyf1       | 1.16 | 2.24 | 2.46 |
| NM_001014008 | asporin                                                                                        | Aspn         | 1.08 | 3.61 | 2.46 |
| AI058733     | EST                                                                                            | –            | 1.38 | 2.87 | 2.46 |
| NM_080581    | ATP-binding cassette, sub-family C (CFTR/MRP), member 3                                        | Abcc3        | 0.95 | 2.37 | 2.45 |
| AA943800     | EST                                                                                            | –            | 1.14 | 2.95 | 2.44 |
| NM_138512    | cytochrome P450, family 2, subfamily c, polypeptide 22                                         | Cyp2c22      | 1.30 | 2.09 | 2.43 |
| NM_001191567 | Golgi integral membrane protein 4                                                              | Golim4       | 0.81 | 2.53 | 2.42 |
| XM_001070024 | similar to Cystatin S precursor (LM protein)                                                   | LOC100365949 | 1.57 | 3.95 | 2.42 |
| NM_001108396 | ARP8 actin-related protein 8 homolog                                                           | Actr8        | 0.85 | 2.68 | 2.42 |
| NM_001191609 | laminin, alpha 5                                                                               | Lama5        | 0.94 | 2.09 | 2.42 |
| NM_017288    | sodium channel, voltage-gated, type I, beta                                                    | Scn1b        | 0.89 | 2.08 | 2.42 |
| BF404398     | EST                                                                                            | –            | 1.59 | 2.05 | 2.42 |
| BF390565     | EST                                                                                            | –            | 1.15 | 2.30 | 2.42 |
| AA894070     | EST                                                                                            | –            | 0.69 | 2.40 | 2.42 |
| AA955079     | EST                                                                                            | –            | 1.60 | 2.42 | 2.41 |
| BE106256     | EST                                                                                            | –            | 0.92 | 2.71 | 2.41 |
| AA875586     | EST                                                                                            | –            | 1.02 | 2.28 | 2.41 |

|              |                                                                              |            |      |      |      |
|--------------|------------------------------------------------------------------------------|------------|------|------|------|
| NM_001108137 | membrane frizzled-related protein                                            | Mfrp       | 1.15 | 2.60 | 2.41 |
| NM_001025065 | angiotensin-like 3                                                           | Angptl3    | 0.98 | 3.08 | 2.41 |
| NM_001013904 | cytochrome P450, family 2, subfamily c, polypeptide 6                        | Cyp2c6     | 1.67 | 3.07 | 2.40 |
| BF401148     | EST                                                                          | –          | 1.38 | 3.28 | 2.40 |
| AA964652     | EST                                                                          | –          | 0.95 | 5.15 | 2.40 |
| AI008432     | EST                                                                          | –          | 0.87 | 2.21 | 2.40 |
| BF401468     | EST                                                                          | –          | 0.94 | 2.13 | 2.40 |
| AA892778     | EST                                                                          | –          | 0.48 | 2.50 | 2.40 |
| NM_053394    | Kruppel-like factor 5                                                        | Klf5       | 1.60 | 2.46 | 2.39 |
| BF283420     | EST                                                                          | –          | 0.90 | 2.21 | 2.39 |
| BE119143     | EST                                                                          | –          | 1.02 | 4.14 | 2.39 |
| BI296715     | EST                                                                          | –          | 1.68 | 2.08 | 2.39 |
| NM_176074    | complement component 6                                                       | C6         | 1.46 | 2.24 | 2.39 |
| NM_001137645 | FYVE, RhoGEF and PH domain containing 6                                      | Fgd6       | 1.19 | 2.30 | 2.38 |
| AI113302     | EST                                                                          | –          | 1.17 | 2.31 | 2.38 |
| AI103536     | EST                                                                          | –          | 0.37 | 2.09 | 2.37 |
| BF393042     | EST                                                                          | –          | 1.37 | 2.72 | 2.37 |
| NM_023969    | lysophosphatidic acid receptor 3                                             | Lpar3      | 1.45 | 4.37 | 2.37 |
| NM_001105776 | forkhead box I1                                                              | Foxi1      | 1.09 | 2.05 | 2.37 |
| NM_030873    | profilin 2                                                                   | Pfn2       | 1.02 | 2.79 | 2.37 |
| NM_022592    | transketolase                                                                | Tkt        | 1.25 | 2.85 | 2.36 |
| NM_024395    | 5-hydroxytryptamine (serotonin) receptor 5B                                  | Htr5b      | 1.75 | 2.13 | 2.36 |
| NM_001024273 | cytidine monophosphate-N-acetylneuraminic acid hydroxylase                   | Cmah       | 1.17 | 2.40 | 2.36 |
| NM_017254    | 5-hydroxytryptamine (serotonin) receptor 2A                                  | Htr2a      | 1.14 | 2.13 | 2.36 |
| BF416353     | EST                                                                          | –          | 1.02 | 3.27 | 2.35 |
| NM_144751    | resection-induced TPI (rs11)                                                 | LOC246267  | 1.12 | 2.27 | 2.35 |
| XM_001069443 | forkhead box E3                                                              | Foxe3      | 0.84 | 2.38 | 2.35 |
| NM_031982    | transient receptor potential cation channel, subfamily V, member 1           | Trpv1      | 1.22 | 2.56 | 2.35 |
| BE111113     | EST                                                                          | –          | 1.03 | 2.09 | 2.34 |
| NM_019241    | gap junction protein, beta 5                                                 | Gjb5       | 1.29 | 3.71 | 2.34 |
| NM_012790    | dentin sialophosphoprotein                                                   | Dspp       | 1.42 | 2.03 | 2.33 |
| AI008973     | EST                                                                          | –          | 1.39 | 2.31 | 2.33 |
| NM_001109474 | EST                                                                          | –          | 1.26 | 3.86 | 2.32 |
| BG376806     | EST                                                                          | –          | 1.15 | 2.76 | 2.32 |
| XM_001077495 | Nuclear receptor co-repressor 1                                              | Ncor1      | 0.69 | 2.28 | 2.32 |
| NM_023971    | dystrophin related protein 2                                                 | Drp2       | 1.04 | 2.80 | 2.32 |
| BI291303     | EST                                                                          | –          | 1.36 | 3.24 | 2.31 |
| XM_001079649 | Similar to KIAA2026 protein                                                  | RGD1311595 | 1.05 | 2.38 | 2.31 |
| NM_022384    | Achaete-scute complex homolog 1                                              | Ascl1      | 1.51 | 2.53 | 2.31 |
| NM_031705    | dihydropyrimidinase                                                          | Dpys       | 0.89 | 2.03 | 2.31 |
| NM_080580    | RAB3D, member RAS oncogene family                                            | Rab3d      | 0.95 | 3.17 | 2.31 |
| NM_053502    | ATP-binding cassette, sub-family G (WHITE), member 1                         | Abcg1      | 1.27 | 2.58 | 2.31 |
| AW531919     | EST                                                                          | –          | 1.13 | 3.67 | 2.31 |
| NM_017306    | dodecenoyl-Coenzyme A delta isomerase (3,2 trans-enoyl-Coenzyme A isomerase) | Dci        | 1.01 | 2.92 | 2.30 |
| NM_001013064 | F-box protein 17                                                             | Fbxo17     | 0.52 | 2.47 | 2.30 |
| BF400669     | EST                                                                          | –          | 1.11 | 2.02 | 2.30 |
| NM_031028    | gamma-aminobutyric acid (GABA) B receptor 1                                  | Gabbr1     | 1.02 | 2.08 | 2.30 |
| NM_031538    | CD8a molecule                                                                | Cd8a       | 1.48 | 2.04 | 2.29 |
| BF388435     | EST                                                                          | –          | 1.84 | 3.28 | 2.29 |
| NM_001106670 | complement component 8, alpha polypeptide                                    | C8a        | 1.14 | 2.07 | 2.28 |
| NM_001106711 | Centromere protein A                                                         | Cenpa      | 1.80 | 3.41 | 2.28 |

|              |                                                                                    |              |      |      |      |
|--------------|------------------------------------------------------------------------------------|--------------|------|------|------|
| BF398910     | EST                                                                                | –            | 0.98 | 2.36 | 2.28 |
| NM_138918    | synovial sarcoma translocation gene on chromosome 18-like 1                        | Ss18l1       | 1.30 | 3.80 | 2.27 |
| NM_012877    | sodium channel, voltage-gated, type II, beta                                       | Scn2b        | 1.02 | 3.32 | 2.27 |
| NM_001130510 | DnaJ (Hsp40) homolog, subfamily B, member 7                                        | Dnajb7       | 1.40 | 4.09 | 2.27 |
| NM_022859    | cysteine-rich secretory protein 1                                                  | Crisp1       | 1.19 | 2.36 | 2.26 |
| BF561222     | EST                                                                                | –            | 1.06 | 3.56 | 2.25 |
| AA964735     | EST                                                                                | –            | 1.52 | 2.05 | 2.25 |
| NM_001012209 | ribonuclease, RNase A family, 12 (non-active)                                      | Rnase12      | 1.02 | 2.40 | 2.25 |
| AI172180     | EST                                                                                | –            | 0.70 | 2.02 | 2.25 |
| AW530665     | EST                                                                                | –            | 1.85 | 3.41 | 2.24 |
| BF418127     | EST                                                                                | –            | 0.87 | 3.95 | 2.24 |
| NM_032070    | high mobility group AT-hook 2                                                      | Hmga2        | 0.89 | 2.42 | 2.24 |
| NM_001134595 | solute carrier family 26, member 10                                                | Slc26a10     | 0.88 | 2.10 | 2.24 |
| NM_001110345 | ubiquitin-conjugating enzyme E2 variant 1                                          | Ube2v1       | 0.93 | 3.16 | 2.24 |
| NM_001107480 | striatin, calmodulin binding protein 4                                             | Strn4        | 1.74 | 4.79 | 2.23 |
| NM_001015025 | serine/threonine kinase 38                                                         | Stk38        | 0.86 | 2.45 | 2.23 |
| NM_001191665 | Rab interacting lysosomal protein-like 1                                           | Rilpl1       | 1.21 | 2.52 | 2.23 |
| NM_001106103 | osteoglycin                                                                        | Ogn          | 0.97 | 3.88 | 2.23 |
| XM_001060972 | similar to RIKEN cDNA 1500015O10                                                   | RGD1305645   | 1.22 | 2.01 | 2.23 |
| BF412617     | EST                                                                                | –            | 0.85 | 2.23 | 2.22 |
| NM_031558    | steroidogenic acute regulatory protein                                             | Star         | 1.70 | 2.07 | 2.22 |
| BF288144     | EST                                                                                | –            | 1.09 | 2.42 | 2.22 |
| BF553125     | EST                                                                                | –            | 0.74 | 2.57 | 2.22 |
| NM_001134792 | similar to complement factor H-related protein                                     | RGD1564614   | 1.42 | 2.33 | 2.22 |
| NM_001159493 | glutamyl-tRNA synthetase 2 mitochondrial (putative)                                | Ears2        | 0.87 | 2.03 | 2.22 |
| NM_001014178 | family with sequence similarity 69, member B                                       | Fam69b       | 1.45 | 3.70 | 2.22 |
| AW920931     | EST                                                                                | –            | 1.78 | 2.57 | 2.22 |
| NM_019302    | v-crk sarcoma virus CT10 oncogene homolog                                          | Crk          | 1.13 | 2.71 | 2.21 |
| AI103612     | EST                                                                                | –            | 1.68 | 2.32 | 2.21 |
| XM_002730008 | translocating chain-associating membrane protein 2                                 | LOC100361830 | 1.56 | 2.36 | 2.20 |
| BF411180     | EST                                                                                | –            | 1.18 | 2.22 | 2.20 |
| AA943548     | EST                                                                                | –            | 1.01 | 2.10 | 2.20 |
| AI548331     | EST                                                                                | –            | 1.26 | 2.87 | 2.20 |
| NM_024349    | adenylate kinase 1                                                                 | Ak1          | 0.79 | 2.01 | 2.19 |
| AI548652     | EST                                                                                | –            | 0.93 | 2.06 | 2.19 |
| NM_013028    | Short stature homeobox 2                                                           | Shox2        | 1.99 | 3.78 | 2.19 |
| NM_001106286 | lymphatic vessel endothelial hyaluronan receptor 1                                 | Lyve1        | 0.98 | 2.15 | 2.19 |
| NM_001107250 | Zinc finger protein 503                                                            | Znf503       | 0.87 | 2.02 | 2.18 |
| NM_001008759 | keratin complex 1, acidic, gene 5                                                  | Krt1-5       | 1.16 | 3.78 | 2.18 |
| NM_001170466 | mast cell peptidase 3                                                              | Mcpt3        | 1.01 | 2.23 | 2.18 |
| NM_031828    | potassium large conductance calcium-activated channel, subfamily M, alpha member 1 | Kenma1       | 1.03 | 2.29 | 2.18 |
| NM_021670    | bone morphogenetic protein 15                                                      | Bmp15        | 0.98 | 4.16 | 2.17 |
| NM_001106595 | SET and MYND domain containing 1                                                   | Smyd1        | 1.00 | 2.16 | 2.17 |
| AI556345     | EST                                                                                | –            | 1.09 | 2.18 | 2.17 |
| NM_031017    | cAMP responsive element binding protein 1                                          | Creb1        | 1.21 | 2.01 | 2.17 |
| AW251649     | EST                                                                                | –            | 0.73 | 2.26 | 2.16 |
| NM_001107780 | hydroxyacid oxidase (glycolate oxidase) 1                                          | Hao1         | 1.93 | 2.54 | 2.16 |
| NM_001034108 | membrane-associated ring finger (C3HC4) 2                                          | March2       | 0.89 | 2.37 | 2.16 |
| BF417885     | EST                                                                                | –            | 1.15 | 3.35 | 2.16 |
| AI137962     | EST                                                                                | –            | 1.63 | 2.87 | 2.16 |
| AA860039     | EST                                                                                | –            | 1.51 | 2.34 | 2.15 |
| NM_001107037 | eosinophil peroxidase                                                              | Epx          | 0.85 | 2.01 | 2.15 |

|              |                                                                     |            |      |      |      |
|--------------|---------------------------------------------------------------------|------------|------|------|------|
| NM_001108251 | ubiquilin 2                                                         | Ubqln2     | 0.89 | 2.32 | 2.15 |
| NM_001107665 | Ubiquitin specific protease 13 (isopeptidase T-3)                   | Usp13      | 1.36 | 2.14 | 2.15 |
| XM_001062926 | aldehyde dehydrogenase 5 family, member A1                          | Aldh5a1    | 1.28 | 2.38 | 2.14 |
| BG374972     | EST                                                                 | –          | 1.07 | 3.54 | 2.14 |
| NM_001191609 | laminin, alpha 5                                                    | Lama5      | 1.69 | 2.65 | 2.14 |
| NM_001013998 | phosphodiesterase 12                                                | Pde12      | 1.41 | 2.05 | 2.14 |
| BF416590     | EST                                                                 | –          | 1.11 | 2.15 | 2.14 |
| NM_001011896 | ATP-binding cassette, sub-family F (GCN20), member 3                | Abcf3      | 1.22 | 2.42 | 2.14 |
| AI145781     | EST                                                                 | –          | 1.03 | 2.28 | 2.13 |
| BI299857     | EST                                                                 | –          | 1.55 | 2.62 | 2.13 |
| XM_001053529 | similar to CG18437-PA                                               | LOC316460  | 0.76 | 3.95 | 2.13 |
| NM_022643    | histone cluster 1, H2ba                                             | Hist1h2ba  | 1.52 | 3.41 | 2.12 |
| BF390528     | EST                                                                 | –          | 1.14 | 2.27 | 2.12 |
| AI011063     | EST                                                                 | –          | 0.82 | 2.33 | 2.12 |
| NM_139262    | cathepsin Q                                                         | Ctsq       | 1.46 | 6.03 | 2.12 |
| BF394144     | EST                                                                 | –          | 1.08 | 2.86 | 2.12 |
| NM_001106883 | apolipoprotein B mRNA editing enzyme, catalytic polypeptide-like 2  | Apobec2    | 1.19 | 2.07 | 2.12 |
| BF387379     | EST                                                                 | –          | 0.73 | 2.99 | 2.11 |
| NM_001195599 | RGD1559980                                                          | RGD1559980 | 1.03 | 6.53 | 2.11 |
| NM_001107611 | RNA binding motif protein 20                                        | Rbm20      | 1.95 | 2.17 | 2.10 |
| NM_053810    | synaptosomal-associated protein 29                                  | Snap29     | 1.50 | 2.94 | 2.10 |
| BF407971     | EST                                                                 | –          | 1.66 | 2.90 | 2.09 |
| NM_030988    | thyroglobulin                                                       | Tg         | 1.47 | 2.57 | 2.08 |
| BM385963     | EST                                                                 | –          | 1.65 | 2.20 | 2.08 |
| AW530922     | EST                                                                 | –          | 0.90 | 3.67 | 2.08 |
| NM_138529    | neuron navigator 2                                                  | Nav2       | 1.32 | 3.12 | 2.08 |
| XM_001060344 | consortin, connexin sorting protein                                 | Cnst       | 1.15 | 2.36 | 2.08 |
| AI639197     | EST                                                                 | –          | 1.39 | 3.27 | 2.08 |
| NM_001106899 | pleckstrin homology domain containing, family B (evectins) member 2 | Plekhb2    | 1.73 | 2.46 | 2.07 |
| NM_017269    | protein tyrosine phosphatase, receptor type, J                      | Ptprj      | 1.01 | 2.34 | 2.07 |
| BF394459     | EST                                                                 | –          | 1.84 | 3.07 | 2.07 |
| AW252555     | EST                                                                 | –          | 0.98 | 2.60 | 2.07 |
| AI412432     | EST                                                                 | –          | 1.05 | 2.14 | 2.07 |
| NM_001145840 | glucosidase, alpha; neutral C                                       | Ganc       | 0.89 | 2.23 | 2.06 |
| XM_001056520 | Similar to cullin 7                                                 | LOC680835  | 1.09 | 2.09 | 2.06 |
| AI600226     | EST                                                                 | –          | 0.87 | 2.49 | 2.06 |
| BG376813     | EST                                                                 | –          | 1.28 | 2.34 | 2.05 |
| AW920132     | EST                                                                 | –          | 0.92 | 2.22 | 2.05 |
| NM_021598    | mast cell protease 8                                                | Mcpt8      | 0.99 | 5.41 | 2.05 |
| BF394645     | EST                                                                 | –          | 0.96 | 2.74 | 2.05 |
| XM_238267    | RGD1560210                                                          | RGD1560210 | 0.96 | 2.31 | 2.05 |
| NM_001122658 | family with sequence similarity 178, member B                       | Fam178b    | 1.04 | 2.50 | 2.04 |
| NM_001077645 | protein kinase, cAMP dependent, catalytic, beta                     | Prkacb     | 1.08 | 2.94 | 2.04 |
| BE112342     | EST                                                                 | –          | 0.74 | 2.67 | 2.04 |
| NM_001024263 | protein kinase D3                                                   | Prkd3      | 1.20 | 2.02 | 2.04 |
| NM_001008854 | RT1 class Ib, locus N1                                              | RT1-N1     | 0.93 | 2.33 | 2.03 |
| NM_001109006 | solute carrier family 23 (nucleobase transporters), member 3        | Slc23a3    | 1.14 | 2.73 | 2.03 |
| XM_002726189 | Sp3 transcription factor                                            | Sp3        | 1.38 | 2.34 | 2.03 |
| NM_134378    | sulfatase 1                                                         | Sulf1      | 1.15 | 2.69 | 2.03 |
| NM_001106664 | tyrosinase-related protein 1                                        | Tyrp1      | 1.14 | 2.02 | 2.03 |
| BE112754     | EST                                                                 | –          | 1.09 | 2.86 | 2.03 |

|              |                                                                                |         |      |      |      |
|--------------|--------------------------------------------------------------------------------|---------|------|------|------|
| NM_031343    | solute carrier family 6 (neurotransmitter transporter, noradrenalin), member 2 | Slc6a2  | 1.84 | 2.39 | 2.03 |
| NM_022218    | chemokine-like receptor 1                                                      | Cmklr1  | 0.90 | 2.46 | 2.03 |
| BE119364     | EST                                                                            | –       | 1.08 | 2.17 | 2.02 |
| NM_001107711 | Moloney leukemia virus 10                                                      | Mov10   | 1.42 | 2.47 | 2.02 |
| AI176826     | EST                                                                            | –       | 0.90 | 2.18 | 2.02 |
| NM_001107965 | UDP-Gal:betaGlcNAc beta 1,4-galactosyltransferase, polypeptide 2               | B4galt2 | 1.05 | 3.05 | 2.02 |
| NM_001109591 | junctional sarcoplasmic reticulum protein 1                                    | Jsrp1   | 0.94 | 2.88 | 2.02 |
| XM_001066061 | late cornified envelope 1D                                                     | Lce1d   | 1.36 | 3.96 | 2.02 |
| NM_001109422 | B-cell CLL/lymphoma 3                                                          | Bcl3    | 1.01 | 2.30 | 2.01 |
| BF411772     | EST                                                                            | –       | 0.79 | 2.23 | 2.00 |
| NM_173098    | solute carrier family 9 (sodium/hydrogen exchanger), member 4                  | Slc9a4  | 1.37 | 2.17 | 2.00 |
| NM_030860    | myocyte enhancer factor 2D                                                     | Mef2d   | 0.98 | 3.16 | 2.00 |

Abbreviations: DBDE, decabromodiphenyl ether; EST, expressed sequence tag.
