# Supplementary material for: Increased Cellular Distribution of Vimentin and Ret in the Cingulum of Rat Offspring After Developmental Exposure to Decabromodiphenyl Ether or 1,2,5,6,9,10-Hexabromocyclododecane
Source: PubMed Central journal article supplement — J Toxicol Pathol. 2013 Jul 10;26(2):119–29. doi: 10.1293/tox.26.119 (PMC3695334; doi:10.1293/tox.26.119), 2013-07-10
Supplement: tox-26-119-s004.pdf [file tox-26-119-s004.pdf]

**Supplementary Table 4.**

List of genes commonly downregulated in the microdissected cerebral white matter region after exposure to DBDE at 100 and 1000 ppm ( $\leq 0.5$ -fold)

| Accession no.             | Gene title                                                                 | Symbol       | DBDE   |         |          |
|---------------------------|----------------------------------------------------------------------------|--------------|--------|---------|----------|
|                           |                                                                            |              | 10 ppm | 100 ppm | 1000 ppm |
| Downregulated (224 genes) |                                                                            |              |        |         |          |
| NM_001108395              | placenta-specific 9                                                        | Plac9        | 0.97   | 0.10    | 0.08     |
| BF411568                  | EST                                                                        | –            | 1.01   | 0.08    | 0.10     |
| NM_021580                 | prolactin family 8, subfamily a, member 4                                  | Prl8a4       | 0.57   | 0.12    | 0.11     |
| NM_019154                 | amelogenin X chromosome                                                    | Amelx        | 1.22   | 0.28    | 0.13     |
| BF393053                  | EST                                                                        | –            | 0.94   | 0.38    | 0.13     |
| NM_001024305              | PRP38 pre-mRNA processing factor 38 (yeast) domain containing B            | Prpf38b      | 0.72   | 0.22    | 0.13     |
| BF544537                  | EST                                                                        | –            | 0.51   | 0.32    | 0.14     |
| AI454929                  | EST                                                                        | –            | 0.94   | 0.15    | 0.14     |
| NM_052803                 | ATPase, Cu <sup>++</sup> transporting, alpha polypeptide                   | Atp7a        | 0.94   | 0.33    | 0.16     |
| NM_019161                 | EST                                                                        | –            | 1.02   | 0.17    | 0.17     |
| AI111659                  | EST                                                                        | –            | 0.96   | 0.47    | 0.17     |
| NM_001173507              | stromal antigen 2                                                          | Stag2        | 0.85   | 0.46    | 0.17     |
| AW532329                  | EST                                                                        | –            | 0.91   | 0.46    | 0.18     |
| NM_001030035              | Retinitis pigmentosa GTPase regulator interacting protein 1                | Rpgrip1      | 0.75   | 0.35    | 0.18     |
| NM_001034134              | eukaryotic translation initiation factor 3, subunit 6 interacting protein  | Eif3s6ip     | 0.97   | 0.38    | 0.19     |
| BI291927                  | EST                                                                        | –            | 0.84   | 0.38    | 0.19     |
| NM_001106055              | MYC binding protein 2                                                      | Mycbp2       | 1.00   | 0.30    | 0.19     |
| NM_057203                 | chemokine (C-C motif) ligand 22                                            | Ccl22        | 0.74   | 0.23    | 0.19     |
| AI638976                  | EST                                                                        | –            | 0.63   | 0.25    | 0.20     |
| NM_031664                 | solute carrier family 28 (sodium-coupled nucleoside transporter), member 2 | Slc28a2      | 1.08   | 0.12    | 0.20     |
| BF418003                  | EST                                                                        | –            | 0.90   | 0.46    | 0.20     |
| NM_053671                 | TATA element modulatory factor 1                                           | Tmfl         | 0.92   | 0.42    | 0.20     |
| NM_001134706              | nucleosomal binding protein 1                                              | Nsbp1        | 1.03   | 0.31    | 0.20     |
| AW919728                  | EST                                                                        | –            | 1.00   | 0.38    | 0.20     |
| NM_022671                 | one cut homeobox 1                                                         | Onecut1      | 1.21   | 0.34    | 0.20     |
| BF418026                  | EST                                                                        | –            | 0.74   | 0.24    | 0.20     |
| BI296453                  | EST                                                                        | –            | 0.95   | 0.27    | 0.21     |
| AI712467                  | EST                                                                        | –            | 1.24   | 0.32    | 0.21     |
| BF413347                  | EST                                                                        | –            | 0.59   | 0.44    | 0.22     |
| AI071599                  | EST                                                                        | –            | 1.07   | 0.28    | 0.22     |
| NM_001107868              | zinc finger, matrin-like                                                   | Zfml         | 0.92   | 0.36    | 0.23     |
| AW527234                  | EST                                                                        | –            | 0.65   | 0.50    | 0.23     |
| AW921461                  | EST                                                                        | –            | 1.06   | 0.04    | 0.23     |
| XR_086345                 | rCG23949-like                                                              | LOC100362458 | 0.75   | 0.26    | 0.23     |
| NM_030584                 | sclerosteosis                                                              | Sost         | 0.57   | 0.46    | 0.23     |
| BG371725                  | EST                                                                        | –            | 1.02   | 0.24    | 0.23     |
| NM_181084                 | tumor protein p53 inducible nuclear protein 1                              | Tp53inp1     | 0.88   | 0.46    | 0.24     |
| AI577552                  | EST                                                                        | –            | 0.93   | 0.28    | 0.24     |
| NM_001024275              | Ras association (RalGDS/AF-6) domain family member 4                       | Rassf4       | 1.03   | 0.43    | 0.25     |
| XM_002726772              | mCG147639-like                                                             | LOC100363606 | 1.25   | 0.17    | 0.25     |
| AW532375                  | EST                                                                        | –            | 0.94   | 0.41    | 0.25     |
| NM_001109260              | similar to RIKEN cDNA 3110035E14                                           | RGD1561849   | 1.04   | 0.26    | 0.26     |
| AI029275                  | EST                                                                        | –            | 1.02   | 0.17    | 0.26     |
| XR_005460                 | Similar to 2410024A21Rik protein                                           | RGD1304878   | 1.58   | 0.40    | 0.26     |
| BE110143                  | EST                                                                        | –            | 0.84   | 0.41    | 0.26     |

|              |                                                                       |            |      |      |      |
|--------------|-----------------------------------------------------------------------|------------|------|------|------|
| NM_001025649 | transmembrane 9 superfamily protein member 4                          | Tm9sf4     | 0.96 | 0.44 | 0.26 |
| NM_001106572 | olfactomedin-like 2A                                                  | Olfml2a    | 1.01 | 0.42 | 0.26 |
| AW253361     | EST                                                                   | –          | 0.96 | 0.41 | 0.26 |
| NM_023962    | platelet-derived growth factor, D polypeptide                         | Pdgfd      | 0.91 | 0.42 | 0.27 |
| AI013758     | EST                                                                   | –          | 0.94 | 0.39 | 0.27 |
| AA944650     | EST                                                                   | –          | 1.16 | 0.31 | 0.27 |
| BM385973     | EST                                                                   | –          | 0.97 | 0.31 | 0.28 |
| BI289090     | EST                                                                   | –          | 0.87 | 0.24 | 0.29 |
| NM_001035000 | histone deacetylase 10                                                | Hdac10     | 1.15 | 0.33 | 0.29 |
| BE095613     | EST                                                                   | –          | 0.90 | 0.38 | 0.29 |
| BF400824     | EST                                                                   | –          | 0.55 | 0.28 | 0.29 |
| BF387018     | EST                                                                   | –          | 0.84 | 0.35 | 0.29 |
| NM_022692    | RAB5A, member RAS oncogene family                                     | Rab5a      | 1.04 | 0.46 | 0.29 |
| XR_005469    | similar to KIAA0339 protein                                           | RGD1311624 | 0.89 | 0.45 | 0.29 |
| NM_001034923 | dihydrouridine synthase 3-like                                        | Dus3l      | 0.85 | 0.14 | 0.29 |
| NM_001108485 | general transcription factor IIH, polypeptide 1                       | Gtf2h1     | 0.81 | 0.37 | 0.30 |
| BF568017     | EST                                                                   | –          | 0.78 | 0.37 | 0.30 |
| BI299977     | EST                                                                   | –          | 0.98 | 0.29 | 0.30 |
| NM_001009637 | leucyl-tRNA synthetase                                                | Lars       | 0.98 | 0.37 | 0.30 |
| NM_030985    | angiotensin II receptor, type 1a                                      | Agtr1a     | 0.91 | 0.44 | 0.30 |
| NM_031610    | EST                                                                   | –          | 0.84 | 0.33 | 0.30 |
| NM_001108564 | amylo-1,6-glucosidase,<br>4-alpha-glucanotransferase                  | AgI        | 1.14 | 0.40 | 0.30 |
| BI300412     | EST                                                                   | –          | 0.67 | 0.33 | 0.30 |
| NM_001034068 | tropomyosin 1, alpha                                                  | Tpm1       | 0.87 | 0.49 | 0.30 |
| BE105927     | EST                                                                   | –          | 0.92 | 0.41 | 0.31 |
| NM_053524    | NADPH oxidase 4                                                       | Nox4       | 0.67 | 0.28 | 0.31 |
| BE119146     | EST                                                                   | –          | 0.90 | 0.35 | 0.31 |
| BF416814     | EST                                                                   | –          | 0.85 | 0.50 | 0.31 |
| BE109223     | EST                                                                   | –          | 1.10 | 0.32 | 0.31 |
| NM_017264    | Proteasome (prosome, macropain) activator<br>subunit 1                | Psme1      | 1.04 | 0.28 | 0.32 |
| NM_199094    | tubulin, beta 2c                                                      | Tubb2c     | 0.95 | 0.48 | 0.32 |
| AI071789     | EST                                                                   | –          | 0.95 | 0.50 | 0.32 |
| NM_133295    | carboxylesterase 3                                                    | Ces3       | 1.08 | 0.35 | 0.32 |
| NM_001008880 | sodium channel, voltage-gated, type IV, beta                          | Scn4b      | 0.98 | 0.24 | 0.32 |
| NM_019188    | microseminoprotein, beta                                              | Msemb      | 0.97 | 0.31 | 0.32 |
| BG373926     | EST                                                                   | –          | 0.63 | 0.28 | 0.32 |
| AI169620     | EST                                                                   | –          | 1.05 | 0.23 | 0.32 |
| NM_001006967 | lysyl-tRNA synthetase                                                 | Kars       | 0.99 | 0.45 | 0.33 |
| AI411637     | EST                                                                   | –          | 0.51 | 0.48 | 0.33 |
| XM_001060853 | ATPase, H <sup>+</sup> transporting, lysosomal accessory<br>protein 2 | Atp6ap2    | 1.04 | 0.32 | 0.33 |
| AA963228     | EST                                                                   | –          | 1.01 | 0.28 | 0.33 |
| NM_017349    | FXYD domain-containing ion transport<br>regulator 2                   | Fxyd2      | 1.41 | 0.26 | 0.34 |
| BM389786     | EST                                                                   | –          | 0.93 | 0.42 | 0.34 |
| BE117531     | EST                                                                   | –          | 0.80 | 0.29 | 0.34 |
| AI010054     | EST                                                                   | –          | 0.92 | 0.46 | 0.34 |
| AA956454     | EST                                                                   | –          | 1.02 | 0.31 | 0.34 |
| XM_001060944 | annexin V-binding protein ABP-10                                      | Abp10      | 0.95 | 0.25 | 0.34 |
| NM_019328    | nuclear receptor subfamily 4, group A, member<br>2                    | Nr4a2      | 0.93 | 0.47 | 0.34 |
| BE119312     | EST                                                                   | –          | 0.88 | 0.13 | 0.34 |
| NM_053426    | Splicing factor 3b, subunit 1                                         | Sf3b1      | 0.68 | 0.42 | 0.34 |
| NM_021693    | salt-inducible kinase 1                                               | Sik1       | 0.91 | 0.13 | 0.35 |

|              |                                                                                           |            |      |      |      |
|--------------|-------------------------------------------------------------------------------------------|------------|------|------|------|
| AI072025     | EST                                                                                       | –          | 0.77 | 0.25 | 0.35 |
| BF413539     | EST                                                                                       | –          | 0.91 | 0.32 | 0.35 |
| BI299522     | EST                                                                                       | –          | 1.11 | 0.23 | 0.35 |
| XM_002725785 | damage-specific DNA binding protein 1                                                     | Ddb1       | 0.86 | 0.35 | 0.35 |
| NM_001112742 | glutamate receptor, ionotropic, AMPA 3                                                    | Gria3      | 1.03 | 0.33 | 0.35 |
| NM_001109023 | pinin, desmosome associated protein                                                       | Pnn        | 1.07 | 0.48 | 0.35 |
| XM_001070053 | kinesin family member 1A                                                                  | Kif1a      | 0.94 | 0.18 | 0.35 |
| AI639055     | EST                                                                                       | –          | 1.02 | 0.20 | 0.36 |
| NM_145721    | CDK5 regulatory subunit associated protein 1                                              | Cdk5rap1   | 0.78 | 0.40 | 0.36 |
| BF400127     | EST                                                                                       | –          | 0.96 | 0.41 | 0.36 |
| XM_001073918 | ferric-chelate reductase 1                                                                | Frrs1      | 0.79 | 0.45 | 0.36 |
| AI136271     | EST                                                                                       | –          | 1.02 | 0.39 | 0.36 |
| NM_019315    | potassium intermediate/small conductance calcium-activated channel, subfamily N, member 3 | Kcnn3      | 0.94 | 0.40 | 0.36 |
| AI029721     | EST                                                                                       | –          | 0.88 | 0.42 | 0.37 |
| AI072270     | EST                                                                                       | –          | 0.99 | 0.40 | 0.37 |
| BF403095     | EST                                                                                       | –          | 0.94 | 0.24 | 0.37 |
| NM_001124768 | tachykinin 1                                                                              | Tac1       | 1.25 | 0.38 | 0.37 |
| NM_001195606 | hypothetical protein LOC686032                                                            | LOC686032  | 0.74 | 0.28 | 0.37 |
| BF404462     | EST                                                                                       | –          | 1.00 | 0.43 | 0.37 |
| BF290198     | EST                                                                                       | –          | 0.63 | 0.38 | 0.37 |
| BE121123     | EST                                                                                       | –          | 0.61 | 0.42 | 0.37 |
| NM_001105929 | zinc finger, CCHC domain containing 8                                                     | Zcchc8     | 1.10 | 0.43 | 0.38 |
| BF398283     | EST                                                                                       | –          | 1.14 | 0.50 | 0.38 |
| NM_001106548 | hypothetical LOC296411                                                                    | RGD1307805 | 1.00 | 0.28 | 0.38 |
| BI296717     | EST                                                                                       | –          | 0.96 | 0.49 | 0.38 |
| NM_053903    | ephrin A5                                                                                 | Efna5      | 0.84 | 0.39 | 0.38 |
| NM_031665    | syntaxin 6                                                                                | Stx6       | 1.04 | 0.36 | 0.38 |
| BE120096     | EST                                                                                       | –          | 1.00 | 0.49 | 0.38 |
| XM_001055673 | similar to SWI/SNF-related matrix-associated actin-dependent regulator of chromatin c2    | LOC685179  | 1.73 | 0.45 | 0.39 |
| NM_001039026 | ubiquitin protein ligase E3 component n-recognin 4                                        | Ubr4       | 0.97 | 0.50 | 0.39 |
| BF284365     | EST                                                                                       | –          | 1.03 | 0.37 | 0.39 |
| AI511079     | EST                                                                                       | –          | 0.78 | 0.40 | 0.39 |
| AI548586     | EST                                                                                       | –          | 0.73 | 0.31 | 0.39 |
| AW251280     | EST                                                                                       | –          | 0.77 | 0.23 | 0.39 |
| NM_001007623 | methyltransferase like 6                                                                  | Mettl6     | 1.21 | 0.29 | 0.39 |
| BE117956     | EST                                                                                       | –          | 1.09 | 0.22 | 0.39 |
| NM_001108378 | short chain dehydrogenase/reductase family 39U, member 1                                  | Sdr39u1    | 0.83 | 0.38 | 0.40 |
| NM_012645    | RT1 class Ib, locus EC2                                                                   | RT1-EC2    | 1.02 | 0.36 | 0.40 |
| BG666316     | EST                                                                                       | –          | 1.00 | 0.50 | 0.40 |
| NM_001106592 | zinc finger protein 282                                                                   | Znf282     | 0.51 | 0.34 | 0.40 |
| BF283568     | EST                                                                                       | –          | 1.01 | 0.27 | 0.40 |
| AW534476     | EST                                                                                       | –          | 0.88 | 0.44 | 0.41 |
| NM_133413    | cysteinyl leukotriene receptor 2                                                          | Cysltr2    | 0.83 | 0.47 | 0.41 |
| BE111740     | EST                                                                                       | –          | 0.67 | 0.29 | 0.41 |
| NM_053927    | erythrocyte protein band 4.1-like 3                                                       | Epb4.113   | 0.68 | 0.41 | 0.41 |
| AI601993     | EST                                                                                       | –          | 0.90 | 0.35 | 0.41 |
| NM_138902    | eosinophil-associated, ribonuclease A family, member 11                                   | Ear11      | 0.93 | 0.32 | 0.41 |
| NM_001008843 | RT1 class I, locus CE5                                                                    | RT1-CE5    | 1.04 | 0.15 | 0.41 |
| XM_001065262 | similar to hypothetical protein                                                           | RGD1563056 | 0.91 | 0.35 | 0.41 |
| XM_001058877 | DAZ interacting protein 3, zinc finger                                                    | Dzip3      | 0.69 | 0.37 | 0.42 |

|              |                                                                                                                         |              |      |      |      |
|--------------|-------------------------------------------------------------------------------------------------------------------------|--------------|------|------|------|
| NM_053817    | neurexin 3                                                                                                              | Nrxn3        | 1.09 | 0.49 | 0.42 |
| AA998248     | EST                                                                                                                     | –            | 1.05 | 0.46 | 0.42 |
| NM_053457    | claudin 11                                                                                                              | Cldn11       | 0.99 | 0.49 | 0.42 |
| BE099838     | EST                                                                                                                     | –            | 1.00 | 0.40 | 0.42 |
| NM_153821    | paired related homeobox 1                                                                                               | Prrx1        | 0.77 | 0.29 | 0.42 |
| BI298185     | EST                                                                                                                     | –            | 0.55 | 0.42 | 0.42 |
| AI554998     | EST                                                                                                                     | –            | 1.81 | 0.49 | 0.42 |
| NM_001037650 | nephronophthisis 4 (juvenile) homolog                                                                                   | Nphp4        | 0.63 | 0.49 | 0.43 |
| NM_013107    | Bone morphogenetic protein 6                                                                                            | Bmp6         | 1.60 | 0.48 | 0.43 |
| XM_002725812 | mCG1051031-like                                                                                                         | LOC100364485 | 1.21 | 0.42 | 0.43 |
| NM_031115    | secretin receptor                                                                                                       | Sctr         | 1.01 | 0.48 | 0.43 |
| XM_001078360 | SRY (sex determining region Y)-box 21                                                                                   | Sox21        | 1.21 | 0.14 | 0.43 |
| BF386350     | EST                                                                                                                     | –            | 0.97 | 0.11 | 0.43 |
| BF400716     | EST                                                                                                                     | –            | 0.87 | 0.48 | 0.43 |
| NM_001011943 | oligonucleotide/oligosaccharide-binding fold containing 1                                                               | Obfc1        | 0.96 | 0.26 | 0.43 |
| AI409359     | EST                                                                                                                     | –            | 1.16 | 0.35 | 0.43 |
| AI137489     | EST                                                                                                                     | –            | 1.20 | 0.50 | 0.43 |
| NM_001107477 | zinc finger protein 329                                                                                                 | Zfp329       | 0.98 | 0.26 | 0.44 |
| NM_001109137 | tubby like protein 4                                                                                                    | Tulp4        | 1.02 | 0.48 | 0.44 |
| BM392272     | EST                                                                                                                     | –            | 0.97 | 0.36 | 0.44 |
| NM_019374    | prodynorphin                                                                                                            | Pdyn         | 0.95 | 0.49 | 0.44 |
| BE120205     | EST                                                                                                                     | –            | 0.98 | 0.48 | 0.44 |
| XM_002726225 | similar to fatty acid desaturase 2; linoleoyl-CoA desaturase (delta-6-desaturase)-like 2; delta-6 fatty acid desaturase | RGD1311224   | 1.04 | 0.50 | 0.44 |
| BI291351     | EST                                                                                                                     | –            | 0.97 | 0.10 | 0.44 |
| NM_022219    | fucosyltransferase 4 (alpha (1,3) fucosyltransferase, myeloid-specific)                                                 | Fut4         | 0.93 | 0.36 | 0.44 |
| BF289978     | EST                                                                                                                     | –            | 0.80 | 0.48 | 0.44 |
| AW526150     | EST                                                                                                                     | –            | 1.00 | 0.37 | 0.44 |
| NM_001105993 | glomulin, FKBP associated protein                                                                                       | Glmn         | 0.58 | 0.30 | 0.44 |
| AI556222     | EST                                                                                                                     | –            | 0.67 | 0.34 | 0.45 |
| NM_173140    | crystallin, beta A2                                                                                                     | Cryba2       | 1.28 | 0.27 | 0.45 |
| NM_001014017 | zinc finger protein 819                                                                                                 | Zfp819       | 1.52 | 0.46 | 0.45 |
| NM_001107809 | Zinc finger protein 512B                                                                                                | Znf512b      | 0.86 | 0.50 | 0.45 |
| AW254395     | EST                                                                                                                     | –            | 0.93 | 0.42 | 0.45 |
| BG670822     | EST                                                                                                                     | –            | 0.82 | 0.43 | 0.45 |
| NM_001107103 | receptor-interacting serine-threonine kinase 4                                                                          | Ripk4        | 0.73 | 0.47 | 0.45 |
| BG378170     | EST                                                                                                                     | –            | 0.97 | 0.33 | 0.46 |
| NM_001106779 | neural precursor cell expressed, developmentally down-regulated 1                                                       | Nedd1        | 1.01 | 0.47 | 0.46 |
| NM_017054    | thromboxane A2 receptor                                                                                                 | Tbxa2r       | 0.96 | 0.41 | 0.46 |
| BF404834     | EST                                                                                                                     | –            | 1.01 | 0.49 | 0.46 |
| NM_030871    | phosphodiesterase 1A, calmodulin-dependent                                                                              | Pde1a        | 1.55 | 0.22 | 0.46 |
| NM_001012168 | tubby-like protein 2                                                                                                    | Tulp2        | 1.30 | 0.44 | 0.46 |
| NM_001024305 | PRP38 pre-mRNA processing factor 38 (yeast) domain containing B                                                         | Prpf38b      | 1.06 | 0.29 | 0.46 |
| NM_001191093 | Ring finger protein 150                                                                                                 | Rnf150       | 1.03 | 0.49 | 0.46 |
| NM_012547    | dopamine receptor D2                                                                                                    | Drd2         | 1.08 | 0.46 | 0.46 |
| BF409020     | EST                                                                                                                     | –            | 1.04 | 0.49 | 0.46 |
| NM_001107199 | potassium channel tetramerisation domain containing 3                                                                   | Kctd3        | 1.58 | 0.28 | 0.46 |
| BM386499     | EST                                                                                                                     | –            | 0.67 | 0.37 | 0.46 |
| BF284363     | EST                                                                                                                     | –            | 0.96 | 0.36 | 0.46 |
| NM_001106964 | transducin (beta)-like 1 X-linked                                                                                       | Tbl1x        | 0.98 | 0.34 | 0.47 |

|              |                                                         |              |      |      |      |
|--------------|---------------------------------------------------------|--------------|------|------|------|
| NM_031150    | zona pellucida glycoprotein 2 (sperm receptor)          | Zp2          | 1.33 | 0.29 | 0.47 |
| BE108111     | EST                                                     | –            | 0.91 | 0.43 | 0.47 |
| AA850773     | EST                                                     | –            | 1.00 | 0.43 | 0.47 |
| XM_001071108 | ribosomal RNA processing 1 homolog B                    | Rrp1b        | 0.97 | 0.25 | 0.47 |
| BF567806     | EST                                                     | –            | 1.23 | 0.33 | 0.48 |
| BF288188     | EST                                                     | –            | 0.93 | 0.37 | 0.48 |
| NM_001105723 | upstream binding transcription factor, RNA polymerase I | Ubtf         | 1.11 | 0.43 | 0.48 |
| AI501207     | EST                                                     | –            | 1.06 | 0.50 | 0.48 |
| BG670822     | EST                                                     | –            | 0.78 | 0.49 | 0.48 |
| NM_172222    | complement component 2                                  | C2           | 0.97 | 0.35 | 0.48 |
| BM385905     | EST                                                     | –            | 0.99 | 0.44 | 0.48 |
| NM_053781    | aldo-keto reductase family 1, member B7                 | Akr1b7       | 1.02 | 0.17 | 0.48 |
| AI554981     | EST                                                     | –            | 0.99 | 0.20 | 0.48 |
| AA943846     | EST                                                     | –            | 1.11 | 0.38 | 0.48 |
| NM_012587    | integrin-binding sialoprotein                           | Ibsp         | 1.17 | 0.17 | 0.48 |
| BF390674     | EST                                                     | –            | 1.10 | 0.40 | 0.48 |
| NM_001024749 | similar to RIKEN cDNA 3110040N11                        | RGD1305713   | 1.14 | 0.41 | 0.48 |
| BF401679     | EST                                                     | –            | 1.06 | 0.32 | 0.49 |
| AI547999     | EST                                                     | –            | 1.25 | 0.42 | 0.49 |
| XM_002727559 | rCG36307-like                                           | LOC100365336 | 1.12 | 0.29 | 0.49 |
| AI180454     | EST                                                     | –            | 1.02 | 0.44 | 0.49 |
| NM_001107750 | tetraspanin 18                                          | Tspan18      | 0.99 | 0.44 | 0.49 |
| AI548961     | EST                                                     | –            | 0.89 | 0.31 | 0.49 |
| NM_001014092 | progesterone and adipoQ receptor family member V        | Paqr5        | 1.23 | 0.29 | 0.49 |
| NM_001107523 | chromodomain helicase DNA binding protein 2             | Chd2         | 1.25 | 0.31 | 0.50 |
| NM_012800    | purinergic receptor P2Y, G-protein coupled, 1           | P2ry1        | 1.21 | 0.45 | 0.50 |
| NM_001106986 | NADPH oxidase organizer 1                               | Noxo1        | 0.80 | 0.31 | 0.50 |
| AA943744     | EST                                                     | –            | 1.01 | 0.37 | 0.50 |
| AI556780     | EST                                                     | –            | 0.90 | 0.42 | 0.50 |

DBDE, decabromodiphenyl ether; EST, expressed sequence tag.
