# Supplementary material for: Increased Cellular Distribution of Vimentin and Ret in the Cingulum of Rat Offspring After Developmental Exposure to Decabromodiphenyl Ether or 1,2,5,6,9,10-Hexabromocyclododecane
Source: PubMed Central journal article supplement — J Toxicol Pathol. 2013 Jul 10;26(2):119–29. doi: 10.1293/tox.26.119 (PMC3695334; doi:10.1293/tox.26.119), 2013-07-10
Supplement: tox-26-119-s005.pdf [file tox-26-119-s005.pdf]

**Supplementary Table 5.**

List of representative genes associated with brain development showing up- or down-regulation commonly after exposure to DBDE ( $\geq 2$ -fold,  $\leq 0.5$ -fold)

| Accession no.                                      | Gene title                                                                | Symbol | DBDE   |         |          |
|----------------------------------------------------|---------------------------------------------------------------------------|--------|--------|---------|----------|
|                                                    |                                                                           |        | 10 ppm | 100 ppm | 1000 ppm |
| 10, 100, 1000 ppm commonly up-regulated (11 genes) |                                                                           |        |        |         |          |
| NM_001136151                                       | Neuregulin 2                                                              | Nrg2   | 2.61   | 3.91    | 4.84     |
| NM_053986                                          | Myosin Ib                                                                 | Myo1b  | 2.10   | 3.56    | 4.53     |
| NM_019236                                          | Hairy and enhancer of split 2                                             | Hes2   | 3.63   | 2.35    | 4.03     |
| NM_017001                                          | Erythropoietin                                                            | Epo    | 3.58   | 3.25    | 4.02     |
| NM_001107413                                       | Iroquois homeobox 3                                                       | Irx3   | 2.42   | 4.11    | 3.79     |
| NM_012841                                          | Deleted in colorectal carcinoma                                           | Dcc    | 3.30   | 2.75    | 3.17     |
| NM_053708                                          | Gastrulation brain homeobox 2                                             | Gbx2   | 2.43   | 2.59    | 2.93     |
| NM_019374                                          | Prodynorphin                                                              | Pdyn   | 2.80   | 3.59    | 2.88     |
| NM_053818                                          | Solute carrier family 6 (neurotransmitter transporter, glycine), member 9 | Slc6a9 | 2.21   | 3.11    | 2.60     |
| NM_139113                                          | Nuclear receptor subfamily 2, group F, member 6                           | Nr2f6  | 3.32   | 2.84    | 2.43     |
| NM_001033955                                       | Calcitonin-related polypeptide alpha                                      | Calca  | 2.10   | 2.78    | 2.03     |
| 10, 100, 1000 ppm commonly down-regulated (1 gene) |                                                                           |        |        |         |          |
| NM_147135                                          | SH3-binding domain kinase 1                                               | Sbk1   | 0.22   | 0.30    | 0.36     |
| 100, 1000 ppm commonly up-regulated (52 genes)     |                                                                           |        |        |         |          |
| NM_022928                                          | G protein-coupled receptor kinase 4                                       | Grk4   | 0.61   | 4.57    | 9.86     |
| NM_024365                                          | 5-hydroxytryptamine (serotonin) receptor 6                                | Htr6   | 1.15   | 14.58   | 8.69     |
| NM_031688                                          | Synuclein, gamma (breast cancer-specific protein 1)                       | Snca   | 0.97   | 4.50    | 6.05     |
| NM_053851                                          | Calcium channel, voltage-dependent, beta 2 subunit                        | Cacnb2 | 1.42   | 3.55    | 5.70     |
| NM_133536                                          | RAB3C, member RAS oncogene family                                         | Rab3c  | 1.00   | 2.31    | 5.68     |
| NM_001108069                                       | Serine/threonine kinase 11                                                | Stk11  | 1.23   | 10.93   | 5.32     |
| NM_023968                                          | Neuropeptide Y receptor Y2                                                | Npy2r  | 1.65   | 3.58    | 5.22     |
| NM_022696                                          | Heart and neural crest derivatives expressed 2                            | Hand2  | 0.88   | 4.27    | 4.42     |
| NM_001109892                                       | Fibroblast growth factor receptor 2                                       | Fgfr2  | 1.26   | 2.70    | 4.30     |
| NM_021659                                          | Synaptotagmin VII                                                         | Syt7   | 0.69   | 4.49    | 4.30     |
| NM_134336                                          | Neuroigin 3                                                               | Nlgn3  | 1.62   | 3.28    | 4.04     |
| NM_019166                                          | Synaptogyrin 1                                                            | Syng1  | 1.57   | 2.83    | 3.88     |
| NM_012996                                          | Oxytocin, prepropeptide                                                   | Oxt    | 0.91   | 4.78    | 3.86     |
| NM_001042579                                       | Unc-13 homolog B                                                          | Unc13b | 1.21   | 3.24    | 3.79     |
| NM_001110099                                       | Ret proto-oncogene                                                        | Ret    | 1.67   | 4.48    | 3.67     |
| NM_031739                                          | Potassium voltage-gated channel, Shal-related subfamily, Kcnd3 member 3   | Kcnd3  | 0.96   | 3.75    | 3.64     |
| NM_012531                                          | Catechol-O-methyltransferase                                              | Comt   | 0.97   | 3.86    | 3.50     |
| NM_022684                                          | BH3 interacting domain death agonist                                      | Bid    | 1.02   | 2.80    | 3.48     |
| NM_017254                                          | 5-hydroxytryptamine (serotonin) receptor 2A                               | Htr2a  | 1.13   | 3.26    | 3.34     |
| NM_153621                                          | Disabled homolog 1                                                        | Dab1   | 0.45   | 2.85    | 3.28     |
| NM_012715                                          | Adrenomedullin                                                            | Adm    | 1.22   | 2.01    | 3.24     |
| NM_021584                                          | Doublecortin-like kinase 1                                                | Dclk1  | 1.11   | 3.98    | 3.18     |
| NM_012568                                          | Glycine receptor, alpha 2                                                 | Glr2   | 1.84   | 2.42    | 3.14     |
| NM_001108880                                       | BARX homeobox 1                                                           | Barx1  | 1.17   | 3.72    | 3.09     |
| NM_013193                                          | Neurofibromin 2                                                           | Nf2    | 1.61   | 3.08    | 3.08     |
| NM_024401                                          | Advillin                                                                  | Avil   | 1.76   | 2.74    | 3.06     |
| NM_031140                                          | Vimentin                                                                  | Vim    | 1.65   | 2.82    | 2.99     |
| NM_024160                                          | Cytochrome b-245, alpha polypeptide                                       | Cyba   | 0.93   | 3.21    | 2.98     |
| NM_031588                                          | Neuregulin 1                                                              | Nrg1   | 0.82   | 2.44    | 2.79     |
| NM_053613                                          | Reticulon 4 receptor                                                      | Rtn4r  | 0.99   | 2.88    | 2.72     |
| NM_053724                                          | Glycine receptor, alpha 3                                                 | Glr3   | 1.15   | 2.05    | 2.71     |
| NM_001002827                                       | Notch homolog 4                                                           | Notch4 | 1.10   | 4.25    | 2.70     |

|                                                  |                                                                                    |          |      |      |      |
|--------------------------------------------------|------------------------------------------------------------------------------------|----------|------|------|------|
| NM_019359                                        | Calponin 3, acidic                                                                 | Cnn3     | 1.11 | 3.64 | 2.67 |
| NM_012944                                        | Dopamine receptor D4                                                               | Drd4     | 0.46 | 4.21 | 2.64 |
| NM_022631                                        | Wingless-type MMTV integration site family, member 5A                              | Wnt5a    | 1.72 | 2.38 | 2.60 |
| NM_022239                                        | Neuromedin U                                                                       | Nmu      | 0.60 | 2.89 | 2.55 |
| NM_031632                                        | Caspase 9, apoptosis-related cysteine peptidase                                    | Casp9    | 1.60 | 2.24 | 2.50 |
| NM_138977                                        | Prokineticin receptor 1                                                            | Prokr1   | 1.02 | 2.51 | 2.48 |
| XM_001077495                                     | Nuclear receptor co-repressor 1                                                    | Ncor1    | 0.69 | 2.28 | 2.32 |
| NM_023971                                        | Dystrophin related protein 2                                                       | Drp2     | 1.04 | 2.80 | 2.32 |
| NM_022384                                        | Achaete-scute complex homolog 1                                                    | Ascl1    | 1.51 | 2.53 | 2.31 |
| NM_138918                                        | Synovial sarcoma translocation gene on chromosome 18-like 1                        | Ss18l1   | 1.30 | 3.80 | 2.27 |
| NM_012877                                        | Sodium channel, voltage-gated, type II, beta                                       | Scn2b    | 1.02 | 3.32 | 2.27 |
| NM_031558                                        | Steroidogenic acute regulatory protein                                             | Star     | 1.70 | 2.07 | 2.22 |
| NM_019302                                        | v-Crk sarcoma virus CT10 oncogene homolog                                          | Crk      | 1.13 | 2.71 | 2.21 |
| NM_031828                                        | Potassium large conductance calcium-activated channel, subfamily M, alpha member 1 | Kcnma1   | 1.03 | 2.29 | 2.18 |
| XM_001062926                                     | Aldehyde dehydrogenase 5 family, member A1                                         | Aldh5a1  | 1.28 | 2.38 | 2.14 |
| NM_001191609                                     | Laminin, alpha 5                                                                   | Lama5    | 1.69 | 2.65 | 2.14 |
| NM_053810                                        | Synaptosomal-associated protein 29                                                 | Snap29   | 1.50 | 2.94 | 2.10 |
| NM_138529                                        | Neuron navigator 2                                                                 | Nav2     | 1.32 | 3.12 | 2.08 |
| NM_031343                                        | Solute carrier family 6 (neurotransmitter transporter, noradrenalin), member 2     | Slc6a2   | 1.84 | 2.39 | 2.03 |
| NM_030860                                        | Myocyte enhancer factor 2D                                                         | Mef2d    | 0.98 | 3.16 | 2.00 |
| 100, 1000 ppm commonly down-regulated (18 genes) |                                                                                    |          |      |      |      |
| NM_052803                                        | ATPase, Cu <sup>++</sup> transporting, alpha polypeptide                           | Atp7a    | 0.94 | 0.33 | 0.16 |
| NM_001106055                                     | MYC binding protein 2                                                              | Mycbp2   | 1.00 | 0.30 | 0.19 |
| NM_030584                                        | Sclerosteosis                                                                      | Sost     | 0.57 | 0.46 | 0.23 |
| NM_001035000                                     | Histone deacetylase 10                                                             | Hdac10   | 1.15 | 0.33 | 0.29 |
| NM_022692                                        | RAB5A, member RAS oncogene family                                                  | Rab5a    | 1.04 | 0.46 | 0.29 |
| NM_019328                                        | Nuclear receptor subfamily 4, group A, member 2                                    | Nr4a2    | 0.93 | 0.47 | 0.34 |
| NM_001112742                                     | Glutamate receptor, ionotropic, AMPA 3                                             | Gria3    | 1.03 | 0.33 | 0.35 |
| NM_001124768                                     | Tachykinin 1                                                                       | Tac1     | 1.25 | 0.38 | 0.37 |
| NM_053903                                        | Ephrin A5                                                                          | EfnA5    | 0.84 | 0.39 | 0.38 |
| NM_053927                                        | Erythrocyte protein band 4.1-like 3                                                | Epb4.113 | 0.68 | 0.41 | 0.41 |
| NM_053817                                        | Neurexin 3                                                                         | Nrxn3    | 1.09 | 0.49 | 0.42 |
| NM_053457                                        | Claudin 11                                                                         | Cldn11   | 0.99 | 0.49 | 0.42 |
| NM_013107                                        | Bone morphogenetic protein 6                                                       | Bmp6     | 1.60 | 0.48 | 0.43 |
| NM_019374                                        | Prodynorphin                                                                       | Pdyn     | 0.95 | 0.49 | 0.44 |
| NM_001106779                                     | Neural precursor cell expressed, developmentally down-regulated 1                  | Nedd1    | 1.01 | 0.47 | 0.46 |
| NM_030871                                        | Phosphodiesterase 1A, calmodulin-dependent                                         | Pde1a    | 1.55 | 0.22 | 0.46 |
| NM_012547                                        | Dopamine receptor D2                                                               | Drd2     | 1.08 | 0.46 | 0.46 |
| NM_012800                                        | Purinergic receptor P2Y, G-protein coupled, 1                                      | P2ry1    | 1.21 | 0.45 | 0.50 |

Abbreviations: DBDE, decabromodiphenyl ether.
